# Supplementary material for: Aortic systolic and pulse pressure invasively and non-invasively obtained: Comparative analysis of recording techniques, arterial sites of measurement, waveform analysis algorithms and calibration methods
Source: Front Physiol. 2023 Jan 16;14:1113972. doi: 10.3389/fphys.2023.1113972 (PMC9885133; doi:10.3389/fphys.2023.1113972)
Supplement: Supplementary file 2 [file Table1.XLSX]

## Sheet: Table_S1_S5_DescriptiveMeasure
	Table S1. Invasive and non-invasive hemodynamic levels obtained during the records obtained with brachial oscillometry (Mobil-O-Graph) (n=34)											Table S2. Invasive and non-invasive hemodynamic levels obtained during the records obtained with radial applanation tonometry (SphygmoCor) (n=34)											Table S3. Hemodynamic data obtained from carotid artery applanation tonometry (SphygmoCor) and from aortic and brachial invasive measurements (n=34)											Table S4. Hemodynamic data obtained from brachial applanation tonometry (SphygmoCor) and from aortic and brachial invasive measurements (n=34)											Table S5. Hemodynamic data obtained from carotid ultrasound (SonoSite - Hemodyn-4M) and from aortic and brachial invasive measurements (n=34)
	Brachial oscillometry (Mobil-O-Graph)											Radial Applanation Tonometry											Carotid Applanation Tonometry											Brachial Applanation Tonometry											Carotid Ultrasonography
	Variable	MV	SEM	SD	Min	p25th	p50th	p75th	Max	Range		Variable	MV	SEM	SD	Min	p25th	p50th	p75th	Max	Range		Variable	MV	SEM	SD	Min	p25th	p50th	p75th	Max	Range		Variable	MV	SEM	SD	Min	p25th	p50th	p75th	Max	Range		Variable	MV	SEM	SD	Min
	Invasive records											Invasive records											Invasive records											Invasive records											Invasive records
	Aortic SBP Invasive [mmHg]	131.545	4.14862	24.1904	83	116	127.507	151.727	178.444	95.4444		Aortic SBP Invasive [mmHg]	134.211	4.11485	23.9935	82	117.5	132.958	153.667	177.333	95.3333		Aortic SBP Invasive [mmHg]	130.916	4.36802	25.0924	77.5	114.333	124.5	151	189.5	112		Aortic SBP Invasive [mmHg]	133.656	4.33696	24.5335	77	120.5	130	154.25	179	102		Aortic SBP Invasive [mmHg]	132.477	4.37508	25.5109	78.75
	Aortic MBP Invasive [mmHg]	92.8861	2.55056	14.8722	66.697	81	90.487	102.25	120.889	54.1919		Aortic MBP Invasive [mmHg]	94.2451	2.46115	14.3509	66.6667	83	92.1667	99.6667	120.667	54		Aortic MBP Invasive [mmHg]	92.6616	2.67423	15.3623	65	80	90	102	130.5	65.5		Aortic MBP Invasive [mmHg]	93.6979	2.61172	14.7741	65	85	90.5	106	121	56		Aortic MBP Invasive [mmHg]	93.5746	2.65694	15.4925	63
	Aortic DBP Invasive [mmHg]	67.6918	1.77495	10.3496	51.5	61	65.9667	76	93	41.5		Aortic DBP Invasive [mmHg]	68.3897	1.70338	9.93232	51.6667	62	66.1667	76.5	93	41.3333		Aortic DBP Invasive [mmHg]	67.5793	1.83217	10.525	51.6667	61	65	73.5	93	41.3333		Aortic DBP Invasive [mmHg]	67.8906	1.81666	10.2766	52	61.5	64.5	74.5	92	40		Aortic DBP Invasive [mmHg]	68.1016	1.82627	10.6489	50.75
	Aortic PP Invasive [mmHg]	63.8527	3.39294	19.7841	24.4545	50.2222	59.8542	82.0909	98.3333	73.8788		Aortic PP Invasive [mmHg]	65.8211	3.46619	20.2112	23	53.25	62.25	83	97.6667	74.6667		Aortic PP Invasive [mmHg]	63.3369	3.58792	20.611	23.5	50.3333	59	82.6667	102	78.5		Aortic PP Invasive [mmHg]	65.7656	3.66083	20.7088	22	53.5	64	82	103	81		Aortic PP Invasive [mmHg]	64.3751	3.54594	20.6762	24
	HR Invasive [beat/minute]	70.4359	2.28921	12.9497	44.8333	59.5545	71.5195	80.9444	104.273	59.4394		HR Invasive [beat/minute]	70.4245	2.26513	12.8135	45	60	71	78	104	59		HR Invasive [beat/minute]	70.0349	2.21917	12.3558	45	60.6667	71.25	79	104	59		HR Invasive [beat/minute]	70.1437	2.78206	14.9818	50	57.5	68	78	104	54		HR Invasive [beat/minute]	69.7158	2.24595	12.705	45
	Brachial SBP Invasive [mmHg]	147.375	4.56975	25.8504	83	132	146	167	191	108		Brachial SBP Invasive [mmHg]	147.859	4.5877	25.952	83	132	146	167	191	108		Brachial SBP Invasive [mmHg]	147.871	4.776	26.5917	83	131	146	169	193	110		Brachial SBP Invasive [mmHg]	145.029	4.85061	27.4392	85	133.25	143.5	165.667	189.333	104.333		Brachial SBP Invasive [mmHg]	147.516	4.63602	26.2253	83
	Brachial MBP Invasive [mmHg]	100.172	2.58115	14.6012	67	92.1429	101	111	123	56		Brachial MBP Invasive [mmHg]	100.531	2.57077	14.5425	67	92	101.5	111	123	56		Brachial MBP Invasive [mmHg]	100.645	2.7402	15.2568	67	93	101	111	131	64		Brachial MBP Invasive [mmHg]	97.7969	2.61179	14.7745	68	88.25	97.75	109.75	120.333	52.3333		Brachial MBP Invasive [mmHg]	100.375	2.67333	15.1226	67
	Brachial DBP Invasive [mmHg]	72.2728	1.92209	10.873	56	63.1429	72	81.5	94	38		Brachial DBP Invasive [mmHg]	72.4375	1.91236	10.818	56	63	72	81	94	38		Brachial DBP Invasive [mmHg]	72.6129	1.99066	11.0836	56	65	72	82	94	38		Brachial DBP Invasive [mmHg]	69.7839	1.74266	9.85797	53	62.75	68.5	76.8333	91.3333	38.3333		Brachial DBP Invasive [mmHg]	72.4062	1.96227	11.1003	56
	Brachial PP Invasive [mmHg]	75.1024	4.28482	24.2386	27	60	77.75	85.5	132	105		Brachial PP Invasive [mmHg]	75.4219	4.30544	24.3553	27	60	77.75	88	132	105		Brachial PP Invasive [mmHg]	75.2581	4.44512	24.7494	27	59	78	86	132	105		Brachial PP Invasive [mmHg]	75.2448	4.3306	24.4976	25	61.1667	75.25	89.25	136.333	111.333		Brachial PP Invasive [mmHg]	75.1094	4.29434	24.2925	27
	Mobil-O-Graph Non-invasive records: sd calibration											Mobil-O-Graph Non-invasive records: sd calibration											Mobil-O-Graph Non-invasive records: sd calibration											Mobil-O-Graph Non-invasive records: sd calibration											Mobil-O-Graph Non-invasive records: sd calibration
	bSBP (MOG_GTF_sd) [mmHg]	132.851	3.53362	20.6044	90.2727	119.091	133.955	147.545	175.778	85.5051		bSBP (MOG_GTF_sd) [mmHg]	134.282	3.57471	20.844	87	127	133.833	150	180	93		bSBP (MOG_GTF_sd) [mmHg]	132.598	3.92801	22.5647	88.5	122.333	131.333	148	174.333	85.8333		bSBP (MOG_GTF_sd) [mmHg]	135.651	3.72022	21.0447	78	126.167	136.083	150	166.667	88.6667		bSBP (MOG_GTF_sd) [mmHg]	132.913	3.69903	21.5689	84.75
	bMBP (MOG_GTF_sd) [mmHg]	97.769	2.55093	14.8744	61.6364	88.5	100.098	107.333	125.778	64.1414		bMBP (MOG_GTF_sd) [mmHg]	98.4461	2.52187	14.7049	58	90	101.75	109.333	122.667	64.6667		bMBP (MOG_GTF_sd) [mmHg]	97.099	2.8384	16.3054	58	89	94	107.5	128	70		bMBP (MOG_GTF_sd) [mmHg]	98.7292	2.78298	15.7429	54	91.8333	100.167	105.75	124.333	70.3333		bMBP (MOG_GTF_sd) [mmHg]	97.8147	2.73116	15.9253	57
	bDBP (MOG_GTF_sd) [mmHg]	80.6807	2.25857	13.1696	48	72.1111	80.1528	89.8571	103.692	55.6923		bDBP (MOG_GTF_sd) [mmHg]	80.9706	2.2501	13.1202	44	73	83.25	90.5	103.5	59.5		bDBP (MOG_GTF_sd) [mmHg]	79.8071	2.48406	14.2699	42	68	79	89	107	65		bDBP (MOG_GTF_sd) [mmHg]	80.7708	2.58525	14.6244	43	73.5	79.25	92.25	104.667	61.6667		bDBP (MOG_GTF_sd) [mmHg]	80.7299	2.46059	14.3476	43.75
	bPP (MOG_GTF_sd) [mmHg]	52.1698	2.18716	12.7532	30.4	41.7273	49	63	82.4545	52.0545		bPP (MOG_GTF_sd) [mmHg]	53.3113	2.39525	13.9666	34	44	49.5833	59.5	86	52		bPP (MOG_GTF_sd) [mmHg]	52.7909	2.36435	13.5822	31.5	43	51	62	82.6667	51.1667		bPP (MOG_GTF_sd) [mmHg]	54.8802	2.48721	14.0698	28	45.1667	52.75	66	82.6667	54.6667		bPP (MOG_GTF_sd) [mmHg]	52.1828	2.21241	12.9004	31.6667
	HR (MOG_GTF_sd) [beat/minute]	71.4016	2.28632	13.3314	42.5	61.5556	72	82.0588	105	62.5		HR (MOG_GTF_sd) [beat/minute]	71.9216	2.30227	13.4244	44	60	73.4167	79.75	105	61		HR (MOG_GTF_sd) [beat/minute]	71.9586	2.30736	13.2548	44	64.6667	72.5	80.5	105	61		HR (MOG_GTF_sd) [beat/minute]	70.5469	2.49887	14.1357	44	60.5	70.9167	81	104.333	60.3333		HR (MOG_GTF_sd) [beat/minute]	71.2304	2.24601	13.0964	45
	aoSBP (MOG_GTF_sd) [mmHg]	123.009	3.45834	20.1654	84.0909	108.545	122.623	135	168.273	84.1818		aoSBP (MOG_GTF_sd) [mmHg]	124.134	3.5984	20.6713	83	111	123.25	138.667	170.667	87.6667		aoSBP (MOG_GTF_sd) [mmHg]	123.727	3.85907	22.1687	81	111.333	122	137	166	85		aoSBP (MOG_GTF_sd) [mmHg]	129.941	3.29962	17.1453	79	120.667	129	141	158.333	79.3333		aoSBP (MOG_GTF_sd) [mmHg]	123.094	3.80669	21.5339	83
	aoDBP (MOG_GTF_sd) [mmHg]	82.1371	2.25759	13.1639	48.3636	73.2222	81.5278	90.8571	104.308	55.9441		aoDBP (MOG_GTF_sd) [mmHg]	82.4672	2.33901	13.4366	44	73	84	92	104.25	60.25		aoDBP (MOG_GTF_sd) [mmHg]	81.1298	2.5057	14.3941	42	70	80	90.5	109	67		aoDBP (MOG_GTF_sd) [mmHg]	85.9414	2.39346	12.4368	57	76.5	86	95.5	106.333	49.3333		aoDBP (MOG_GTF_sd) [mmHg]	82.1036	2.6074	14.7497	44
	aoPP (MOG_GTF_sd) [mmHg]	40.8705	2.12694	12.4021	23.4545	31.9091	37.3273	44.6667	75.0909	51.6364		aoPP (MOG_GTF_sd) [mmHg]	41.6591	2.37558	13.6467	23.3333	31.75	38.75	47	76	52.6667		aoPP (MOG_GTF_sd) [mmHg]	42.6561	2.31937	13.3237	23	32.75	40	47.5	77	54		aoPP (MOG_GTF_sd) [mmHg]	43.9383	2.45905	12.7776	22	35	46	53	67.6667	45.6667		aoPP (MOG_GTF_sd) [mmHg]	40.9865	2.29919	13.0062	24
	Mobil-O-Graph Non-invasive records: 033 calibration											Mobil-O-Graph Non-invasive records: 033 calibration											Mobil-O-Graph Non-invasive records: 033 calibration											Mobil-O-Graph Non-invasive records: 033 calibration											Mobil-O-Graph Non-invasive records: 033 calibration
	bSBP (MOG_GTF_033) [mmHg]	132.851	3.53362	20.6044	90.2727	119.091	133.955	147.545	175.778	85.5051		bSBP (MOG_GTF_033) [mmHg]	134.282	3.57471	20.844	87	127	133.833	150	180	93		bSBP (MOG_GTF_033) [mmHg]	132.598	3.92801	22.5647	88.5	122.333	131.333	148	174.333	85.8333		bSBP (MOG_GTF_033) [mmHg]	135.651	3.72022	21.0447	78	126.167	136.083	150	166.667	88.6667		bSBP (MOG_GTF_033) [mmHg]	132.913	3.69903	21.5689	84.75
	bMBP (MOG_GTF_033) [mmHg]	97.769	2.55093	14.8744	61.6364	88.5	100.098	107.333	125.778	64.1414		bMBP (MOG_GTF_033) [mmHg]	98.4461	2.52187	14.7049	58	90	101.75	109.333	122.667	64.6667		bMBP (MOG_GTF_033) [mmHg]	97.099	2.8384	16.3054	58	89	94	107.5	128	70		bMBP (MOG_GTF_033) [mmHg]	98.7292	2.78298	15.7429	54	91.8333	100.167	105.75	124.333	70.3333		bMBP (MOG_GTF_033) [mmHg]	97.8147	2.73116	15.9253	57
	bDBP (MOG_GTF_033) [mmHg]	80.6807	2.25857	13.1696	48	72.1111	80.1528	89.8571	103.692	55.6923		bDBP (MOG_GTF_033) [mmHg]	80.9706	2.2501	13.1202	44	73	83.25	90.5	103.5	59.5		bDBP (MOG_GTF_033) [mmHg]	79.8071	2.48406	14.2699	42	68	79	89	107	65		bDBP (MOG_GTF_033) [mmHg]	80.7708	2.58525	14.6244	43	73.5	79.25	92.25	104.667	61.6667		bDBP (MOG_GTF_033) [mmHg]	80.7299	2.46059	14.3476	43.75
	bPP (MOG_GTF_033) [mmHg]	52.1698	2.18716	12.7532	30.4	41.7273	49	63	82.4545	52.0545		bPP (MOG_GTF_033) [mmHg]	53.3113	2.39525	13.9666	34	44	49.5833	59.5	86	52		bPP (MOG_GTF_033) [mmHg]	52.7909	2.36435	13.5822	31.5	43	51	62	82.6667	51.1667		bPP (MOG_GTF_033) [mmHg]	54.8802	2.48721	14.0698	28	45.1667	52.75	66	82.6667	54.6667		bPP (MOG_GTF_033) [mmHg]	52.1828	2.21241	12.9004	31.6667
	HR (MOG_GTF_033) [beat/minute]	71.4016	2.28632	13.3314	42.5	61.5556	72	82.0588	105	62.5		HR (MOG_GTF_033) [beat/minute]	71.9216	2.30227	13.4244	44	60	73.4167	79.75	105	61		HR (MOG_GTF_033) [beat/minute]	71.9586	2.30736	13.2548	44	64.6667	72.5	80.5	105	61		HR (MOG_GTF_033) [beat/minute]	70.5469	2.49887	14.1357	44	60.5	70.9167	81	104.333	60.3333		HR (MOG_GTF_033) [beat/minute]	71.2304	2.24601	13.0964	45
	aoSBP (MOG_GTF_033) [mmHg]	123.013	3.30821	19.29	84.5294	110.3	121.167	140.846	158	73.4706		aoSBP (MOG_GTF_033) [mmHg]	124.497	3.40259	19.5464	86	116.25	125	137	158	72		aoSBP (MOG_GTF_033) [mmHg]	121.906	3.57008	20.5085	77	109.75	120	137	159	82		aoSBP (MOG_GTF_033) [mmHg]	127.077	3.37799	17.5525	74	120	124.333	142.667	156.25	82.25		aoSBP (MOG_GTF_033) [mmHg]	122.635	3.52663	19.9496	81
	aoDBP (MOG_GTF_033) [mmHg]	82.3315	2.3285	13.5774	48.0909	73	81.9167	92.1818	104.091	56		aoDBP (MOG_GTF_033) [mmHg]	82.7197	2.41843	13.8928	43	74	84	92.5	104.667	61.6667		aoDBP (MOG_GTF_033) [mmHg]	80.7394	2.48555	14.2784	41	68	80	90	108	67		aoDBP (MOG_GTF_033) [mmHg]	85.5247	2.39004	12.419	56	76.5	85	95	105.333	49.3333		aoDBP (MOG_GTF_033) [mmHg]	82.2161	2.68976	15.2156	43
	aoPP (MOG_GTF_033) [mmHg]	40.7341	2.14777	12.5235	23.7	30.6667	39.1307	49	76.5	52.8		aoPP (MOG_GTF_033) [mmHg]	41.8081	2.36963	13.6125	23.3333	30.3333	38	53	73.5	50.1667		aoPP (MOG_GTF_033) [mmHg]	41.0889	2.27543	13.0713	20	31	39.3333	46	73.5	53.5		aoPP (MOG_GTF_033) [mmHg]	41.534	2.58689	13.4419	18	34	38.3333	49.3333	77.25	59.25		aoPP (MOG_GTF_033) [mmHg]	40.3714	2.05893	11.647	24
	Mobil-O-Graph Non-invasive records: osc calibration											Mobil-O-Graph Non-invasive records: osc calibration											Mobil-O-Graph Non-invasive records: osc calibration											Mobil-O-Graph Non-invasive records: osc calibration											Mobil-O-Graph Non-invasive records: osc calibration
	bSBP (MOG_GTF_osc) [mmHg]	132.851	3.53362	20.6044	90.2727	119.091	133.955	147.545	175.778	85.5051		bSBP (MOG_GTF_osc) [mmHg]	134.282	3.57471	20.844	87	127	133.833	150	180	93		bSBP (MOG_GTF_osc) [mmHg]	132.598	3.92801	22.5647	88.5	122.333	131.333	148	174.333	85.8333		bSBP (MOG_GTF_osc) [mmHg]	135.651	3.72022	21.0447	78	126.167	136.083	150	166.667	88.6667		bSBP (MOG_GTF_osc) [mmHg]	132.913	3.69903	21.5689	84.75
	bMBP (MOG_GTF_osc) [mmHg]	104.523	2.7146	15.8287	67	96.2727	106.578	113.6	135.111	68.1111		bMBP (MOG_GTF_osc) [mmHg]	105.328	2.68659	15.6654	63	97	107.458	116	133.333	70.3333		bMBP (MOG_GTF_osc) [mmHg]	103.899	3.02083	17.3533	64	94.6667	105	114	136	72		bMBP (MOG_GTF_osc) [mmHg]	105.922	2.89799	16.3935	59	98.6667	107.5	113.667	132.667	73.6667		bMBP (MOG_GTF_osc) [mmHg]	104.641	2.90608	16.9452	62
	bDBP (MOG_GTF_osc) [mmHg]	80.6807	2.25857	13.1696	48	72.1111	80.1528	89.8571	103.692	55.6923		bDBP (MOG_GTF_osc) [mmHg]	80.9706	2.2501	13.1202	44	73	83.25	90.5	103.5	59.5		bDBP (MOG_GTF_osc) [mmHg]	79.8071	2.48406	14.2699	42	68	79	89	107	65		bDBP (MOG_GTF_osc) [mmHg]	80.7708	2.58525	14.6244	43	73.5	79.25	92.25	104.667	61.6667		bDBP (MOG_GTF_osc) [mmHg]	80.7299	2.46059	14.3476	43.75
	bPP (MOG_GTF_osc) [mmHg]	52.1698	2.18716	12.7532	30.4	41.7273	49	63	82.4545	52.0545		bPP (MOG_GTF_osc) [mmHg]	53.3113	2.39525	13.9666	34	44	49.5833	59.5	86	52		bPP (MOG_GTF_osc) [mmHg]	52.7909	2.36435	13.5822	31.5	43	51	62	82.6667	51.1667		bPP (MOG_GTF_osc) [mmHg]	54.8802	2.48721	14.0698	28	45.1667	52.75	66	82.6667	54.6667		bPP (MOG_GTF_osc) [mmHg]	52.1828	2.21241	12.9004	31.6667
	HR (MOG_GTF_osc) [beat/minute]	71.4016	2.28632	13.3314	42.5	61.5556	72	82.0588	105	62.5		HR (MOG_GTF_osc) [beat/minute]	71.9216	2.30227	13.4244	44	60	73.4167	79.75	105	61		HR (MOG_GTF_osc) [beat/minute]	71.9586	2.30736	13.2548	44	64.6667	72.5	80.5	105	61		HR (MOG_GTF_osc) [beat/minute]	70.5469	2.49887	14.1357	44	60.5	70.9167	81	104.333	60.3333		HR (MOG_GTF_osc) [beat/minute]	71.2304	2.24601	13.0964	45
	aoSBP (MOG_GTF_osc) [mmHg]	139.468	3.94406	22.9976	95.5294	126.143	136.258	157.667	188.5	92.9706		aoSBP (MOG_GTF_osc) [mmHg]	141.27	4.09977	23.5514	100	127.5	144	159	185.5	85.5		aoSBP (MOG_GTF_osc) [mmHg]	138.271	4.22906	24.2941	85.5	124.667	137	155	185.5	100		aoSBP (MOG_GTF_osc) [mmHg]	144.154	4.19605	21.8033	82	130	141	164	187	105		aoSBP (MOG_GTF_osc) [mmHg]	138.928	4.17544	23.6199	92.4
	aoDBP (MOG_GTF_osc) [mmHg]	82.9403	2.38428	13.9026	48.0909	73.1111	82.8889	92.4167	109.364	61.2727		aoDBP (MOG_GTF_osc) [mmHg]	83.3586	2.47141	14.1972	43	76	84	92.75	110	67		aoDBP (MOG_GTF_osc) [mmHg]	81.2136	2.50141	14.3695	41	68.3333	80.6667	90	108	67		aoDBP (MOG_GTF_osc) [mmHg]	85.9784	2.39964	12.4689	56	77	85	96	105.667	49.6667		aoDBP (MOG_GTF_osc) [mmHg]	82.849	2.75569	15.5885	43
	aoPP (MOG_GTF_osc) [mmHg]	56.4993	2.90733	16.9525	32.1	42.9286	53.8636	67.7778	104.167	72.0667		aoPP (MOG_GTF_osc) [mmHg]	57.9596	3.17826	18.2577	33.3333	43.3333	52.5	74	100.5	67.1667		aoPP (MOG_GTF_osc) [mmHg]	56.998	3.06157	17.5874	28.5	44	56	64.5	100.5	72		aoPP (MOG_GTF_osc) [mmHg]	58.1574	3.62981	18.861	26	45	54	69.5	106.75	80.75		aoPP (MOG_GTF_osc) [mmHg]	56.1109	2.87098	16.2407	32
	MV: mean value. SEM: standard error of the mean. SD: standard deviation. p25th, p50th and p75th: 25th percentile (first quartile), 50th percentile (median or second quartile) and 75th percentile (third quartile). SBP, MBP, DBP and PP: systolic, mean, diastolic and pulse blood pressure, respectively. HR: heart rate. Prefix "p", "b" and "ao" indicate "peripheral", "brachial" artery and "aortic" roo…											Radial Applanation Tonometry Non-invasive records: P2 and GTF, sd calibration											Carotid Applanation Tonometry Non-invasive records: GTF, sd calibration											Brachial Applanation Tonometry Non-invasive records: GTF, sd calibration											Common carotid artery ultrasonographic records
												Radial SBP (SCOR_RT_GTF_sd) [mmHg]	134.282	3.57471	20.844	87	127	133.833	150	180	93		cSBP (SCOR_CT_GTF_sd) [mmHg]	136.334	3.89252	22.3608	93	127	135.333	151	179.667	86.6667		bSBP (SCOR_BT_GTF_sd) [mmHg]	135.557	3.71379	21.0084	78	126.167	136.083	150	166.667	88.6667		CCA Systolic Diameter [mm]	7.80971	0.154077	0.898414	5.47
												Radial DBP (SCOR_RT_GTF_sd) [mmHg]	80.9706	2.2501	13.1202	44	73	83.25	90.5	103.5	59.5		cDBP (SCOR_CT_GTF_sd) [mmHg]	79.6187	2.45792	14.1197	42	68.3333	79	89	107	65		bDBP (SCOR_BT_GTF_sd) [mmHg]	80.6615	2.58793	14.6395	43	73.5	78.75	92.25	104.667	61.6667		CCA Diastolic Diameter [mm]	7.43235	0.150315	0.876481	5
												Radial MBP (SCOR_RT_GTF_sd) [mmHg]	100.439	2.85184	16.629	58	91.5	102.833	110.333	128	70		cMBP (SCOR_CT_GTF_sd) [mmHg]	103.239	3.03989	17.4628	64	93.6667	104	116	136	72		bMBP (SCOR_BT_GTF_sd) [mmHg]	104.078	3.16247	17.8896	52	95.8333	104.25	115.917	132.667	80.6667		CCA Mean Diameter [mm]	7.62118	0.151921	0.885844	5.22
												aoSBP (SCOR_RT_P2_sd) [mmHg]	126.93	4.04457	22.8795	76	113.625	123	140.25	178	102		aoSBP (SCOR_CT_GTF_sd) [mmHg]	132.598	3.92801	22.5647	88.5	122.333	131.333	148	174.333	85.8333		b_aoSBP (SCOR_BT_GTF_sd) [mmHg]	128.518	3.87269	21.9072	65	120.667	130	143.75	160.667	95.6667		CCA IMT [mm]	0.7943	0.0410376	0.224772	0.441
												aoPP (SCOR_RT_P2_sd) [mmHg]	45.3255	2.72634	15.4225	22.75	33.6667	41.5	55	84	61.25		aoDBP (SCOR_CT_GTF_sd) [mmHg]	79.8071	2.48406	14.2699	42	68	79	89	107	65		b_aoDBP (SCOR_BT_GTF_sd) [mmHg]	82.4844	2.62274	14.8365	44	75.3333	80.8333	95	107	63		CCA Peak Systolic Velocity [cm/s]	65.4818	4.04468	23.2349	33.5
												aoSBP (SCOR_RT_GTF_sd) [mmHg]	124.387	3.66733	21.384	75	114	123.75	139.5	170.667	95.6667		aoPP (SCOR_CT_GTF_sd) [mmHg]	52.7909	2.36435	13.5822	31.5	43	51	62	82.6667	51.1667		b_aoPP (SCOR_BT_GTF_sd) [mmHg]	46.1406	2.37655	13.4438	21	37.5	45.25	57.75	70.3333	49.3333		CCA End Diastolic Velocity [cm/s]	14.7448	0.910629	5.23117	0.72
												aoDBP (SCOR_RT_GTF_sd) [mmHg]	82.1176	2.3039	13.4339	45	72.75	84	91.5	105.75	60.75		Carotid Applanation Tonometry Non-invasive records: GTF, 033 calibration											Brachial Applanation Tonometry Non-invasive records: GTF, 033 calibration											CCA Resistive Index	0.765758	0.0130778	0.0751262	0.66
												aoPP (SCOR_RT_GTF_sd) [mmHg]	42.3333	2.30848	13.4606	22.3333	31.3333	40.25	51.3333	75.3333	53		cSBP (SCOR_CT_GTF_033) [mmHg]	122.28	3.56176	20.4608	82	114.5	120	137	155.5	73.5		bSBP (SCOR_BT_GTF_033) [mmHg]	124.237	3.10037	17.5383	73	116.167	124.75	134.625	157.5	84.5		CCA Pulsatile Index	1.90909	0.104669	0.601277	1.14
												Radial Applanation Tonometry Non-invasive records: P2 and GTF, 033 calibration											cDBP (SCOR_CT_GTF_033) [mmHg]	79.7096	2.46376	14.1532	42	68	79	89	107	65		bDBP (SCOR_BT_GTF_033) [mmHg]	80.6615	2.58793	14.6395	43	73.5	78.75	92.25	104.667	61.6667		CCA Systo-diastolic Index	6.69061	2.21671	12.734	2.95
												Radial SBP (SCOR_RT_GTF_033) [mmHg]	130.275	3.05552	17.8166	87	123.5	132.875	141.667	166	79		cMBP (SCOR_CT_GTF_033) [mmHg]	97.1596	2.83653	16.2946	58	89	95.3333	107.5	128	70		bMBP (SCOR_BT_GTF_033) [mmHg]	98.6198	2.78162	15.7352	54	91.8333	99.75	105.75	124.333	70.3333		Common carotid artery diameter re-calibration: 033 calibration
												Radial DBP (SCOR_RT_GTF_033) [mmHg]	80.9706	2.2501	13.1202	44	73	83.25	90.5	103.5	59.5		aoSBP (SCOR_CT_GTF_033) [mmHg]	119.515	3.59662	20.661	77	112.333	118	134.667	153	76		aoSBP (SCOR_BT_GTF_033) [mmHg]	118.203	3.18137	17.9966	70	111.5	119	130.333	148	78		aoSBP (Echo_ExpAdj_033) [mmHg]	120.108	3.41037	19.8857	84.8329
												Radial MBP (SCOR_RT_GTF_033) [mmHg]	98.4461	2.52187	14.7049	58	90	101.75	109.333	122.667	64.6667		aoDBP (SCOR_CT_GTF_033) [mmHg]	79.8071	2.48406	14.2699	42	68	79	89	107	65		aoDBP (SCOR_BT_GTF_033) [mmHg]	82.0417	2.60092	14.713	45	74.8333	79.8333	93.9167	106.667	61.6667		aoPP (Echo_ExpAdj_033) [mmHg]	39.3777	2.20707	12.8693	22.8442
												aoSBP (SCOR_RT_P2_033) [mmHg]	122.339	3.50236	19.8124	76	113.25	121.167	134.5	164.667	88.6667		aoPP (SCOR_CT_GTF_033) [mmHg]	39.7081	2.07988	11.948	21	30	37	47.6667	65.3333	44.3333		aoPP (SCOR_BT_GTF_033) [mmHg]	36.2083	1.87919	10.6303	13	28.5	35.8333	46.5	57	44		Common carotid artery diameter re-calibration: 033HR calibration
												aoPP (SCOR_RT_P2_033) [mmHg]	40.7344	2.39147	13.5282	24	32	36	47.125	80	56		Carotid Applanation Tonometry Non-invasive records: GTF, 033HR calibration											Brachial Applanation Tonometry Non-invasive records: GTF, 033HR calibration											aoSBP (Echo_ExpAdj_033HR) [mmHg]	132.211	3.99451	23.2918	96.1959
												aoSBP (SCOR_RT_GTF_033) [mmHg]	120.61	3.07992	17.9588	75	111	122.208	130	158.333	83.3333		cSBP (SCOR_CT_GTF_033HR) [mmHg]	133.212	3.88503	22.3178	91	122	131.4	146.333	168.5	77.5		bSBP (SCOR_BT_GTF_033HR) [mmHg]	135.734	3.4755	19.6604	79	125	136.25	149.5	174.5	95.5		aoPP (Echo_ExpAdj_033HR) [mmHg]	51.4806	2.98418	17.4006	28.7933
												aoDBP (SCOR_RT_GTF_033) [mmHg]	81.8382	2.26803	13.2248	45	72.75	84	91.5	105	60		cDBP (SCOR_CT_GTF_033HR) [mmHg]	79.6288	2.45747	14.1171	42	68.3333	79	89	107	65		bDBP (SCOR_BT_GTF_033HR) [mmHg]	80.7708	2.58525	14.6244	43	73.5	79.25	92.25	104.667	61.6667		Common carotid artery diameter re-calibration: 0412 calibration
												aoPP (SCOR_RT_GTF_033) [mmHg]	38.6765	2.0106	11.7237	22.6667	30	34.8333	46	71.3333	48.6667		cMBP (SCOR_CT_GTF_033HR) [mmHg]	101.724	2.94864	16.9387	62	92.6667	102	112	133.5	71.5		bMBP (SCOR_BT_GTF_033HR) [mmHg]	103.471	2.89831	16.3953	57	95.6667	104.75	111.333	131	74		aoSBP (Echo_ExpAdj_0412) [mmHg]	131.785	3.92599	22.8923	95.9238
												Radial Applanation Tonometry Non-invasive records: P2 and GTF, 033HR calibration											aoSBP (SCOR_CT_GTF_033HR) [mmHg]	129.973	3.83202	22.0133	86	119	128.5	143.333	165	79		aoSBP (SCOR_BT_GTF_033HR) [mmHg]	128.06	3.47113	19.6357	75	119.667	128.5	141.625	162	87		aoPP (Echo_ExpAdj_0412) [mmHg]	51.0547	2.9415	17.1517	28.5583
												Radial SBP (SCOR_RT_GTF_033HR) [mmHg]	143.382	3.47053	20.2365	99	133.333	143.875	158	185	86		aoDBP (SCOR_CT_GTF_033HR) [mmHg]	79.8071	2.48406	14.2699	42	68	79	89	107	65		aoDBP (SCOR_BT_GTF_033HR) [mmHg]	82.4453	2.59696	14.6906	45	75	80.5	94.6667	106.667	61.6667		Common carotid artery diameter re-calibration: osc calibration
												Radial DBP (SCOR_RT_GTF_033HR) [mmHg]	80.9706	2.2501	13.1202	44	73	83.25	90.5	103.5	59.5		aoPP (SCOR_CT_GTF_033HR) [mmHg]	50.1657	2.41275	13.8602	27	39.5	48.5	61.3333	75.3333	48.3333		aoPP (SCOR_BT_GTF_033HR) [mmHg]	45.5859	2.26452	12.8101	18	37	45.1667	58.25	67	49		aoSBP (Echo_ExpAdj_osc) [mmHg]	138.423	4.31904	25.1841	100.783
												Radial MBP (SCOR_RT_GTF_033HR) [mmHg]	103.12	2.64112	15.4002	62	94	105.833	115	130	68		Carotid Applanation Tonometry Non-invasive records: GTF, 0412 calibration											Brachial Applanation Tonometry Non-invasive records: GTF, 0412 calibration											aoPP (Echo_ExpAdj_osc) [mmHg]	57.6933	3.42486	19.9702	31.5378
												aoSBP (SCOR_RT_P2_033HR) [mmHg]	132.995	3.84562	21.7541	85	121	134	145.25	183	98		cSBP (SCOR_CT_GTF_0412) [mmHg]	132.898	3.94937	22.6874	89.5	120.667	129	147	168	78.5		bSBP (SCOR_BT_GTF_0412) [mmHg]	135.839	3.42155	19.3552	79	126.167	136.25	149.75	172	93		Common carotid artery diameter re-calibration: inv calibration
												aoPP (SCOR_RT_P2_033HR) [mmHg]	51.3906	2.79041	15.7849	31.5	41.5	46	57.25	92.3333	60.8333		cDBP (SCOR_CT_GTF_0412) [mmHg]	79.6348	2.45713	14.1151	42	68.3333	79	89	107	65		bDBP (SCOR_BT_GTF_0412) [mmHg]	80.7708	2.58525	14.6244	43	73.5	79.25	92.25	104.667	61.6667		aoSBP (Echo_ExpAdj_inv) [mmHg]	130.774	4.83368	28.185	80.57
												aoSBP (SCOR_RT_GTF_033HR) [mmHg]	130.998	3.35937	19.5883	84	119.5	132.375	142.333	174.667	90.6667		cMBP (SCOR_CT_GTF_0412) [mmHg]	101.482	2.93901	16.8833	62	92.25	101	112	133	71		bMBP (SCOR_BT_GTF_0412) [mmHg]	103.458	2.85605	16.1563	57	96.1667	104.833	110.333	129.333	72.3333		aoPP (Echo_ExpAdj_inv) [mmHg]	61.6978	4.14698	23.8226	24.57
												aoDBP (SCOR_RT_GTF_033HR) [mmHg]	82.1299	2.2831	13.3127	45	73	84	91.5	105.5	60.5		aoSBP (SCOR_CT_GTF_0412) [mmHg]	129.393	3.95967	22.7466	85	117.667	127	146	164.5	79.5		aoSBP (SCOR_BT_GTF_0412) [mmHg]	128.146	3.44357	19.4798	75	120.667	128	144.417	160	85		MV: mean value. SEM: standard error of the mean. SD: standard deviation. p25th, p50th and p75th: 25th percentile (first quartile), 50th percentile (median or second quartile) and 75th percentile (third quartile). SBP, MBP, DBP and PP: systolic, mean, diastolic and pulse blood pressure, respectively. HR: heart rate. Prefix "p", "b" and "ao" indicate "peripheral", "brachial" artery and "aortic" roo…
												aoPP (SCOR_RT_GTF_033HR) [mmHg]	48.9069	2.36289	13.7779	29.6667	38	44.6667	57	82.3333	52.6667		aoDBP (SCOR_CT_GTF_0412) [mmHg]	79.8071	2.48406	14.2699	42	68	79	89	107	65		aoDBP (SCOR_BT_GTF_0412) [mmHg]	82.4089	2.58983	14.6503	45	75	80.5	94.5	106.667	61.6667
												Radial Applanation Tonometry Non-invasive records: P2 and GTF, 0412 calibration											aoPP (SCOR_CT_GTF_0412) [mmHg]	49.5859	2.56317	14.7243	26	37	46.5	59.5	81	55		aoPP (SCOR_BT_GTF_0412) [mmHg]	45.7526	2.32685	13.1627	18	36.25	45.8333	58.25	70.6667	52.6667
												Radial SBP (SCOR_RT_GTF_0412) [mmHg]	142.782	3.41491	19.9122	99	133.333	144.125	155	183	84		Carotid Applanation Tonometry Non-invasive records: GTF, osc calibration											Brachial Applanation Tonometry Non-invasive records: GTF, osc calibration
												Radial DBP (SCOR_RT_GTF_0412) [mmHg]	80.9706	2.2501	13.1202	44	73	83.25	90.5	103.5	59.5		cSBP (SCOR_CT_GTF_osc) [mmHg]	138.63	4.24737	24.3993	89	124.333	134.333	152.667	175.5	86.5		bSBP (SCOR_BT_GTF_osc) [mmHg]	141.82	3.65471	20.6742	81	131	140.25	156.625	179.5	98.5
												Radial MBP (SCOR_RT_GTF_0412) [mmHg]	102.895	2.6142	15.2433	62	95	105.375	113.667	129.333	67.3333		cDBP (SCOR_CT_GTF_osc) [mmHg]	79.65	2.45271	14.0897	42	68.3333	79	89	107	65		bDBP (SCOR_BT_GTF_osc) [mmHg]	80.6615	2.58793	14.6395	43	73.5	78.75	92.25	104.667	61.6667
												aoSBP (SCOR_RT_P2_0412) [mmHg]	132.766	3.91524	22.1479	85	121	132.25	145.5	181.333	96.3333		cMBP (SCOR_CT_GTF_osc) [mmHg]	103.869	3.03128	17.4134	64	94.6667	105	114	136	72		bMBP (SCOR_BT_GTF_osc) [mmHg]	105.828	2.89525	16.378	59	98.6667	106.5	113.667	132.667	73.6667
												aoPP (SCOR_RT_P2_0412) [mmHg]	51.1615	2.92632	16.5538	30.5	40.75	44.875	58.625	99	68.5		aoSBP (SCOR_CT_GTF_osc) [mmHg]	134.791	4.24187	24.3677	85	121.333	132.333	150	171.5	86.5		aoSBP (SCOR_BT_GTF_osc) [mmHg]	133.273	3.61485	20.4487	77	123.667	132.5	150.25	166.5	89.5
												aoSBP (SCOR_RT_GTF_0412) [mmHg]	130.652	3.39361	19.788	84	121	132.417	142	173.333	89.3333		aoDBP (SCOR_CT_GTF_osc) [mmHg]	79.8071	2.48406	14.2699	42	68	79	89	107	65		aoDBP (SCOR_BT_GTF_osc) [mmHg]	82.5703	2.58673	14.6328	45	75.4167	80.8333	94.6667	107	62
												aoDBP (SCOR_RT_GTF_0412) [mmHg]	82.1005	2.28356	13.3153	45	73	84	91.5	105.5	60.5		aoPP (SCOR_CT_GTF_osc) [mmHg]	54.9843	2.88491	16.5725	28	43	50.5	66.6667	91	63		aoPP (SCOR_BT_GTF_osc) [mmHg]	50.7344	2.638	14.9228	19	40	50.1667	64.75	80	61
												aoPP (SCOR_RT_GTF_0412) [mmHg]	48.549	2.46105	14.3503	29	38	43.5833	56.3333	88	59		Carotid Applanation Tonometry Non-invasive records: GTF, inv calibration											Brachial Applanation Tonometry Non-invasive records: GTF, inv calibration
												Radial Applanation Tonometry Non-invasive records: P2 and GTF, osc calibration											cSBP (SCOR_CT_GTF_inv) [mmHg]	128.724	4.15462	23.8665	81.5	114	129.4	140.667	187.5	106		bSBP (SCOR_BT_GTF_inv) [mmHg]	136.224	4.10837	23.2404	80	123	142.5	151.25	180.5	100.5
												Radial SBP (SCOR_RT_GTF_osc) [mmHg]	149.515	3.71957	21.6886	102	139.333	150.042	163	193.333	91.3333		cDBP (SCOR_CT_GTF_inv) [mmHg]	67.546	1.75318	10.0713	53.6667	61	64.6667	73	91	37.3333		bDBP (SCOR_BT_GTF_inv) [mmHg]	69.8151	1.73959	9.84061	53	62.75	68.5	76.8333	91.3333	38.3333
												Radial DBP (SCOR_RT_GTF_osc) [mmHg]	80.6765	2.24146	13.0699	44	73	82	90.5	103.5	59.5		cMBP (SCOR_CT_GTF_inv) [mmHg]	92.8333	2.65553	15.2548	65	82	90	102	130.5	65.5		bMBP (SCOR_BT_GTF_inv) [mmHg]	97.7708	2.61596	14.7981	68	88.25	97.75	109.75	120.333	52.3333
												Radial MBP (SCOR_RT_GTF_osc) [mmHg]	105.078	2.69069	15.6893	63	97	107.125	116	133.333	70.3333		aoSBP (SCOR_CT_GTF_inv) [mmHg]	124.98	4.12289	23.6842	78	104.333	126.5	137.333	182	104		aoSBP (SCOR_BT_GTF_inv) [mmHg]	127.93	3.97159	22.4667	76	116.5	134.333	142.75	164.5	88.5
												aoSBP (SCOR_RT_P2_osc) [mmHg]	138.224	4.26396	24.1206	87	125	137.375	151.75	191.333	104.333		aoDBP (SCOR_CT_GTF_inv) [mmHg]	67.7308	1.79767	10.3268	54	61	65	73.5	93	39		aoDBP (SCOR_BT_GTF_inv) [mmHg]	71.8828	1.80773	10.226	57	64.5	70.5833	79.75	97	40
												aoPP (SCOR_RT_P2_osc) [mmHg]	56.9323	3.3108	18.7287	33.5	45	50.0833	66.125	111.667	78.1667		aoPP (SCOR_CT_GTF_inv) [mmHg]	57.2495	3.32126	19.0792	17	42	55	73	94.5	77.5		aoPP (SCOR_BT_GTF_inv) [mmHg]	56.0052	3.18394	18.0111	19	40.3333	61.9167	69.5	81.5	62.5
												aoSBP (SCOR_RT_GTF_osc) [mmHg]	136.005	3.64987	21.2822	86	125.333	137.833	148.75	182.333	96.3333		Carotid Applanation Tonometry Non-invasive records: NPROC, sd calibration											Brachial Applanation Tonometry Non-invasive records: NPMA, sd calibration
												aoDBP (SCOR_RT_GTF_osc) [mmHg]	81.9706	2.28625	13.331	45	73.5	84	91.5	105.5	60.5		aoSBP (SCOR_CT_NPROC_sd) [mmHg]	132.598	3.92801	22.5647	88.5	122.333	131.333	148	174.333	85.8333		aoSBP (SCOR_BT_NPMA_6.0_sd) [mmHg]	132.077	3.84561	21.754	70.34	123.465	133.207	146.519	163.53	93.19
												aoPP (SCOR_RT_GTF_osc) [mmHg]	54.0294	2.7889	16.262	31.6667	41.6667	49.4167	64	99.3333	67.6667		aoDBP (SCOR_CT_NPROC_sd) [mmHg]	79.8071	2.48406	14.2699	42	68	79	89	107	65		aoPP (SCOR_BT_NPMA_6.0_sd) [mmHg]	51.4151	2.46552	13.9471	25.69	42.4958	50.095	63.155	77.4333	51.7433
												Radial Applanation Tonometry Non-invasive records: P2 and GTF, inv calibration											aoPP (SCOR_CT_NPROC_sd) [mmHg]	52.7909	2.36435	13.5822	31.5	43	51	62	82.6667	51.1667		Brachial Applanation Tonometry Non-invasive records: NPMA, 033 calibration
												Radial SBP (SCOR_RT_GTF_inv) [mmHg]	140.14	3.71786	21.6786	83	130	140	154	183.333	100.333		Carotid Applanation Tonometry Non-invasive records: NPROC, 033 calibration											aoSBP (SCOR_BT_NPMA_6.0_033) [mmHg]	121.166	3.14721	17.8033	71.68	113.544	120.593	132.719	153.55	81.87
												Radial DBP (SCOR_RT_GTF_inv) [mmHg]	68.3897	1.70338	9.93232	51.6667	62	66.1667	76.5	93	41.3333		aoSBP (SCOR_CT_NPROC_033) [mmHg]	121.787	3.55732	20.4353	81	111.333	120	137.667	155.5	74.5		aoPP (SCOR_BT_NPMA_6.0_033) [mmHg]	40.5048	2.00317	11.3317	15.68	33.3625	39.6183	51.7375	61.85	46.17
												Radial MBP (SCOR_RT_GTF_inv) [mmHg]	94.2255	2.45363	14.307	67	83	92.1667	99.6667	120.667	53.6667		aoDBP (SCOR_CT_NPROC_033) [mmHg]	79.8071	2.48406	14.2699	42	68	79	89	107	65		Brachial Applanation Tonometry Non-invasive records: NPMA, 033HR calibration
												aoSBP (SCOR_RT_P2_inv) [mmHg]	129.193	3.9403	22.2897	77	116.125	126.417	142.5	179	102		aoPP (SCOR_CT_NPROC_033) [mmHg]	41.9798	2.18825	12.5705	23	31.5	39	51	67.6667	44.6667		aoSBP (SCOR_BT_NPMA_6.0_033HR) [mmHg]	131.819	3.46994	19.6289	76.91	123.193	130.783	144.667	169.4	92.49
												aoPP (SCOR_RT_P2_inv) [mmHg]	60.138	3.32817	18.827	18	50.1667	61	72	99	81		Carotid Applanation Tonometry Non-invasive records: NPROC, 033HR calibration											aoPP (SCOR_BT_NPMA_6.0_033HR) [mmHg]	51.0482	2.43627	13.7816	20.91	42.7325	48.8483	64.265	75.29	54.38
												aoSBP (SCOR_RT_GTF_inv) [mmHg]	126.468	3.49494	20.3788	77	115.333	126.708	140.333	169.667	92.6667		aoSBP (SCOR_CT_NPROC_033HR) [mmHg]	132.881	3.83642	22.0386	90	121.333	131.333	147	168	78		Brachial Applanation Tonometry Non-invasive records: NPMA, 0412 calibration
												aoDBP (SCOR_RT_GTF_inv) [mmHg]	69.7917	1.77662	10.3594	52	63.5	67.4167	78	95	43		aoDBP (SCOR_CT_NPROC_033HR) [mmHg]	79.8071	2.48406	14.2699	42	68	79	89	107	65		aoSBP (SCOR_BT_NPMA_6.0_0412) [mmHg]	131.715	3.46164	19.582	76.91	123.395	130.748	146.9	166.95	90.04
												aoPP (SCOR_RT_GTF_inv) [mmHg]	56.7304	2.78055	16.2133	17	48.6667	57.5	69	88	71		aoPP (SCOR_CT_NPROC_033HR) [mmHg]	53.0742	2.53831	14.5815	30	41.6667	49.5	65.5	78.6667	48.6667		aoPP (SCOR_BT_NPMA_6.0_0412) [mmHg]	50.9446	2.47674	14.0106	20.91	42.11	49.75	65.0075	76.42	55.51
												Radial Applanation Tonometry Non-invasive records: NPMA_4.0_sd calibration											Carotid Applanation Tonometry Non-invasive records: NPROC, 0412 calibration											Brachial Applanation Tonometry Non-invasive records: NPMA, osc calibration
												aoSBP (SCOR_RT_NPMA_4.0_sd) [mmHg]	124.085	3.63452	21.1927	74.32	115.105	123.653	139.115	170.08	95.76		aoSBP (SCOR_CT_NPROC_0412) [mmHg]	132.387	3.91324	22.4799	88.5	120	129.5	147	166.5	78		aoSBP (SCOR_BT_NPMA_6.0_osc) [mmHg]	137.432	3.61461	20.4473	78.65	127.476	135.6	152.442	174.295	95.645
												aoPP (SCOR_RT_NPMA_4.0_sd) [mmHg]	43.1143	2.32072	13.532	23.7533	32.16	41.82	52.91	76.08	52.3267		aoDBP (SCOR_CT_NPROC_0412) [mmHg]	79.8071	2.48406	14.2699	42	68	79	89	107	65		aoPP (SCOR_BT_NPMA_6.0_osc) [mmHg]	56.7705	2.7933	15.8013	22.65	46.79	55.3125	72.045	86.4133	63.7633
												Radial Applanation Tonometry Non-invasive records: NPMA_4.4_sd calibration											aoPP (SCOR_CT_NPROC_0412) [mmHg]	52.5803	2.68761	15.4391	28.5	40	50	63	84	55.5		Brachial Applanation Tonometry Non-invasive records: NPMA, inv calibration
												aoSBP (SCOR_RT_NPMA_4.4_sd) [mmHg]	125.647	3.65982	21.3402	76.11	116.405	125.074	140.47	172.557	96.4467		Carotid Applanation Tonometry Non-invasive records: NPROC, osc calibration											aoSBP (SCOR_BT_NPMA_6.0_inv) [mmHg]	132.146	4.1151	23.2785	77.65	120.417	138.122	147.3	173.69	96.04
												aoPP (SCOR_RT_NPMA_4.4_sd) [mmHg]	44.6763	2.35971	13.7594	24.9633	34.3533	42.87	54.76	78.5567	53.5933		aoSBP (SCOR_CT_NPROC_osc) [mmHg]	138.286	4.19179	24.08	91	123.333	134.333	152.333	175	84		aoPP (SCOR_BT_NPMA_6.0_inv) [mmHg]	62.3311	3.32841	18.8283	22.65	49.8183	66.9642	73.5737	94.9533	72.3033
												Radial Applanation Tonometry Non-invasive records: NPMA_4.0_033 calibration											aoDBP (SCOR_CT_NPROC_osc) [mmHg]	79.8071	2.48406	14.2699	42	68	79	89	107	65		MV: mean value. SEM: standard error of the mean. SD: standard deviation. p25th, p50th and p75th: 25th percentile (first quartile), 50th percentile (median or second quartile) and 75th percentile (third quartile). SBP, MBP, DBP and PP: systolic, mean, diastolic and pulse blood pressure, respectively. HR: heart rate. Prefix "p", "b" and "ao" indicate "peripheral", "brachial" artery and "aortic" roo…
												aoSBP (SCOR_RT_NPMA_4.0_033) [mmHg]	120.273	3.04782	17.7717	74.11	112.15	122.85	129.003	157.873	83.7633		aoPP (SCOR_CT_NPROC_osc) [mmHg]	58.4788	3.00564	17.2661	32	45	55	71	94.6667	62.6667
												aoPP (SCOR_RT_NPMA_4.0_033) [mmHg]	39.3025	1.96486	11.457	23.9533	30.11	35.6275	47.4067	69.1633	45.21		Carotid Applanation Tonometry Non-invasive records: NPROC, inv calibration
												Radial Applanation Tonometry Non-invasive records: NPMA_4.4_033 calibration											aoSBP (SCOR_CT_NPROC_inv) [mmHg]	127.955	4.09221	23.508	80.5	114	128.667	140.667	186.5	106
												aoSBP (SCOR_RT_NPMA_4.4_033) [mmHg]	121.768	3.06673	17.8819	75.89	113.355	123.89	130.84	159.97	84.08		aoDBP (SCOR_CT_NPROC_inv) [mmHg]	67.5591	1.83649	10.5498	51.6667	61	65	73.5	93	41.3333
												aoPP (SCOR_RT_NPMA_4.4_033) [mmHg]	40.7978	2.01075	11.7246	25.1967	31.8625	37.08	48.88	71.2367	46.04		aoPP (SCOR_CT_NPROC_inv) [mmHg]	60.3955	3.35285	19.2607	20	49	57.25	76.3333	99	79
												Radial Applanation Tonometry Non-invasive records: NPMA_4.0_033HR calibration											MV: mean value. SEM: standard error of the mean. SD: standard deviation. p25th, p50th and p75th: 25th percentile (first quartile), 50th percentile (median or second quartile) and 75th percentile (third quartile). SBP, MBP, DBP and PP: systolic, mean, diastolic and pulse blood pressure, respectively. HR: heart rate. Prefix "p", "b" and "ao" indicate "peripheral", "brachial" artery and "aortic" roo…
												aoSBP (SCOR_RT_NPMA_4.0_033HR) [mmHg]	130.648	3.33236	19.4308	82.71	121.075	131.974	142.833	174.203	91.4933
												aoPP (SCOR_RT_NPMA_4.0_033HR) [mmHg]	49.6773	2.32387	13.5504	31.2433	38.71	45.2496	58.195	80.2033	48.96
												Radial Applanation Tonometry Non-invasive records: NPMA_4.4_033HR calibration
												aoSBP (SCOR_RT_NPMA_4.4_033HR) [mmHg]	132.543	3.36583	19.626	85	122.55	134.002	144.757	176.84	91.84
												aoPP (SCOR_RT_NPMA_4.4_033HR) [mmHg]	51.5729	2.39081	13.9407	32.8733	40.975	46.945	59.745	83.7467	50.8733
												Radial Applanation Tonometry Non-invasive records: NPMA_4.0_0412 calibration
												aoSBP (SCOR_RT_NPMA_4.0_0412) [mmHg]	130.089	3.34018	19.4764	82.71	121.157	132.295	142.54	172.757	90.0467
												aoPP (SCOR_RT_NPMA_4.0_0412) [mmHg]	49.1183	2.38106	13.8838	30.5033	38.69	44.3863	54.97	85.69	55.1867
												Radial Applanation Tonometry Non-invasive records: NPMA_4.4_0412 calibration
												aoSBP (SCOR_RT_NPMA_4.4_0412) [mmHg]	131.949	3.36514	19.6219	85	122.86	134.31	144.3	175.347	90.3467
												aoPP (SCOR_RT_NPMA_4.4_0412) [mmHg]	50.9784	2.43679	14.2088	32.09	40.395	46.2442	56.9133	88.2533	56.1633
												Radial Applanation Tonometry Non-invasive records: NPMA_4.0_Osc calibration
												aoSBP (SCOR_RT_NPMA_4.0_osc) [mmHg]	135.583	3.60663	21.0301	84.86	125.627	137.553	146.903	181.67	96.81
												aoPP (SCOR_RT_NPMA_4.0_osc) [mmHg]	54.9067	2.69529	15.7161	33.4033	42.82	49.6525	63.8933	96.51	63.1067
												Radial Applanation Tonometry Non-invasive records: NPMA_4.4_Osc calibration
												aoSBP (SCOR_RT_NPMA_4.4_osc) [mmHg]	137.656	3.64474	21.2523	87.28	127.303	139.273	148.33	184.55	97.27
												aoPP (SCOR_RT_NPMA_4.4_osc) [mmHg]	56.9793	2.76614	16.1292	35.14	44.3675	52.0125	65.8833	99.4067	64.2667
												Radial Applanation Tonometry Non-invasive records: NPMA_4.0_inv calibration
												aoSBP (SCOR_RT_NPMA_4.0_inv) [mmHg]	126.136	3.46722	20.2172	76.2	115.463	125.787	140.33	169.12	92.92
												aoPP (SCOR_RT_NPMA_4.0_inv) [mmHg]	57.7467	2.77702	16.1927	17.2	48.13	58.5	68.73	89.12	71.92
												Radial Applanation Tonometry Non-invasive records: NPMA_4.4_inv calibration
												aoSBP (SCOR_RT_NPMA_4.4_inv) [mmHg]	128.267	3.52377	20.5469	77.22	118	128.124	142.11	172.023	94.8033
												aoPP (SCOR_RT_NPMA_4.4_inv) [mmHg]	59.8773	2.82597	16.4781	18.22	51.0375	61.4583	70.54	92.0233	73.8033
												MV: mean value. SEM: standard error of the mean. SD: standard deviation. p25th, p50th and p75th: 25th percentile (first quartile), 50th percentile (median or second quartile) and 75th percentile (third quartile). SBP, MBP, DBP and PP: systolic, mean, diastolic and pulse blood pressure, respectively. HR: heart rate. Prefix "p", "b" and "ao" indicate "peripheral", "brachial" artery and "aortic" roo…
[truncated: 5 more columns]

## Sheet: Table_S6_S7_CCC
		Table S6. Lin´s Concordance Correlation Coefficient (CCC) (Non-invasive: x, Invasive: y): aoSBP								Table S7. Lin´s Concordance Correlation Coefficient (CCC) (Non-invasive: x, Invasive: y): aoPP
			Cal.: bSBP/bDBP	Cal.: bMBP0.33/bDBP	Cal.: bMBP0.33HR/bDBP	Cal.: bMBP0.412/bDBP	Cal.: bMBPosc/bDBP	Cal.: bMBPinv/bDBPinv			Cal.: bSBP/bDBP	Cal.: bMBP0.33/bDBP	Cal.: bMBP0.33HR/bDBP	Cal.: bMBP0.412/bDBP	Cal.: bMBPosc/bDBP	Cal.: bMBPinv/bDBPinv
		BA Oscillometry: Brachial-Aortic GTF								BA Oscillometry: Brachial-Aortic GTF
			aoSBP (MOG_GTF_sd)	aoSBP (MOG_GTF_033)	---------	---------	aoSBP (MOG_GTF_osc)	---------			aoPP (MOG_GTF_sd)	aoPP (MOG_GTF_033)	---------	---------	aoPP (MOG_GTF_osc)	---------
		CCC	0.8111	0.7839	---------	---------	0.7986	---------		CCC	0.3006	0.3039	---------	---------	0.6166	---------
		CCC, 95% CI	0.6790 to 0.8923	0.6393 to 0.8750	---------	---------	0.6463 to 0.8897	---------		CCC, 95% CI	0.1459 to 0.4409	0.1493 to 0.4440	---------	---------	0.3823 to 0.7764	---------
		r (Pearson coefficient; "precision")	0.887	0.8671	---------	---------	0.846	---------		r (Pearson coefficient; "precision")	0.6672	0.674	---------	---------	0.6752	---------
		Bias correction factor Cb ("accuracy")	0.9145	0.9041	---------	---------	0.9439	---------		Bias correction factor Cb ("accuracy")	0.4505	0.4509	---------	---------	0.9132	---------
		RA Tonometry: Radial-Aortic GTF								RA Tonometry: Radial-Aortic GTF
			aoSBP (SCOR_RT_GTF_sd)	aoSBP (SCOR_RT_GTF_033)	aoSBP (SCOR_RT_GTF_033HR)	aoSBP (SCOR_RT_GTF_0412)	aoSBP (SCOR_RT_GTF_osc)	aoSBP (SCOR_RT_GTF_inv)			aoPP (SCOR_RT_GTF_sd)	aoPP (SCOR_RT_GTF_033)	aoPP (SCOR_RT_GTF_033HR)	aoPP (SCOR_RT_GTF_0412)	aoPP (SCOR_RT_GTF_osc)	aoPP (SCOR_RT_GTF_inv)
		CCC	0.8346	0.6994	0.8548	0.8386	0.8476	0.8856		CCC	0.3712	0.2307	0.4048	0.3995	0.5074	0.7973
		CCC, 95% CI	0.7194 to 0.9051	0.5438 to 0.8085	0.7429 to 0.9202	0.7141 to 0.9117	0.7216 to 0.9193	0.8045 to 0.9343		CCC, 95% CI	0.2180 to 0.5065	0.1008 to 0.3529	0.2066 to 0.5711	0.1979 to 0.5686	0.2709 to 0.6861	0.6728 to 0.8779
		r (Pearson coefficient; "precision")	0.921	0.8836	0.8821	0.8657	0.8565	0.9534		r (Pearson coefficient; "precision")	0.79	0.6354	0.6491	0.6348	0.63	0.9203
		Bias correction factor Cb ("accuracy")	0.9062	0.7915	0.969	0.9686	0.9897	0.9289		Bias correction factor Cb ("accuracy")	0.4698	0.3631	0.6236	0.6293	0.8054	0.8663
		RA Tonometry: 2nd Radial Shoulder								RA Tonometry: 2nd Radial Shoulder
			aoSBP (SCOR_RT_P2_sd)	aoSBP (SCOR_RT_P2_033)	aoSBP (SCOR_RT_P2_033HR)	aoSBP (SCOR_RT_P2_0412)	aoSBP (SCOR_RT_P2_osc)	aoSBP (SCOR_RT_P2_inv)			aoPP (SCOR_RT_P2_sd)	aoPP (SCOR_RT_P2_033)	aoPP (SCOR_RT_P2_033HR)	aoPP (SCOR_RT_P2_0412)	aoPP (SCOR_RT_P2_osc)	aoPP (SCOR_RT_P2_inv)
		CCC	0.8304	0.7027	0.8373	0.8171	0.8085	0.883		CCC	0.4298	0.2807	0.4726	0.4678	0.5729	0.8399
		CCC, 95% CI	0.6969 to 0.9083	0.5270 to 0.8207	0.6975 to 0.9157	0.6620 to 0.9051	0.6451 to 0.9012	0.7833 to 0.9384		CCC, 95% CI	0.2486 to 0.5820	0.1256 to 0.4224	0.2493 to 0.6482	0.2395 to 0.6471	0.3201 to 0.7496	0.7108 to 0.9142
		r (Pearson coefficient; "precision")	0.8897	0.8493	0.8472	0.8263	0.8136	0.9202		r (Pearson coefficient; "precision")	0.7619	0.6518	0.6614	0.6462	0.6461	0.8889
		Bias correction factor Cb ("accuracy")	0.9334	0.8273	0.9884	0.989	0.9938	0.9595		Bias correction factor Cb ("accuracy")	0.5642	0.4307	0.7146	0.7239	0.8867	0.9448
		RA Tonometry: Radial NPMA (fs/4.0)								RA Tonometry: Radial NPMA (fs/4.0)
			aoSBP (SCOR_RT_NPMA_40_sd)	aoSBP (SCOR_RT_NPMA_40_033)	aoSBP (SCOR_RT_NPMA_40_033HR)	aoSBP (SCOR_RT_NPMA_40_0412)	aoSBP (SCOR_RT_NPMA_40_osc)	aoSBP (SCOR_RT_NPMA_40_inv)			aoPP (SCOR_RT_NPMA_40_sd)	aoPP (SCOR_RT_NPMA_40_033)	aoPP (SCOR_RT_NPMA_40_033HR)	aoPP (SCOR_RT_NPMA_40_0412)	aoPP (SCOR_RT_NPMA_40_osc)	aoPP (SCOR_RT_NPMA_40_inv)
		CCC	0.8293	0.6963	0.8585	0.8375	0.8568	0.8822		CCC	0.3911	0.2427	0.4267	0.4098	0.5408	0.8321
		CCC, 95% CI	0.7127 to 0.9013	0.5431 to 0.8047	0.7508 to 0.9218	0.7147 to 0.9102	0.7382 to 0.9240	0.8008 to 0.9316		CCC, 95% CI	0.2354 to 0.5272	0.1122 to 0.3650	0.2287 to 0.5908	0.2099 to 0.5769	0.3113 to 0.7107	0.7255 to 0.8997
		r (Pearson coefficient; "precision")	0.9218	0.8914	0.8897	0.8714	0.8659	0.9562		r (Pearson coefficient; "precision")	0.8028	0.6626	0.6704	0.649	0.6625	0.938
		Bias correction factor Cb ("accuracy")	0.8996	0.7812	0.9649	0.961	0.9895	0.9226		Bias correction factor Cb ("accuracy")	0.4872	0.3663	0.6364	0.6315	0.8163	0.8871
		RA Tonometry: Radial NPMA (fs/4.4)								RA Tonometry: Radial NPMA (fs/4.4)
			aoSBP (SCOR_RT_NPMA_44_sd)	aoSBP (SCOR_RT_NPMA_44_033)	aoSBP (SCOR_RT_NPMA_44_033HR)	aoSBP (SCOR_RT_NPMA_44_0412)	aoSBP (SCOR_RT_NPMA_44_osc)	aoSBP (SCOR_RT_NPMA_44_inv)			aoPP (SCOR_RT_NPMA_44_sd)	aoPP (SCOR_RT_NPMA_44_033)	aoPP (SCOR_RT_NPMA_44_033HR)	aoPP (SCOR_RT_NPMA_44_0412)	aoPP (SCOR_RT_NPMA_44_osc)	aoPP (SCOR_RT_NPMA_44_inv)
		CCC	0.8537	0.7221	0.8625	0.8439	0.8424	0.9099		CCC	0.42	0.2586	0.4532	0.4356	0.5646	0.8699
		CCC, 95% CI	0.7465 to 0.9177	0.5717 to 0.8255	0.7553 to 0.9248	0.7230 to 0.9146	0.7139 to 0.9160	0.8414 to 0.9496		CCC, 95% CI	0.2568 to 0.5599	0.1186 to 0.3886	0.2418 to 0.6235	0.2228 to 0.6089	0.3258 to 0.7356	0.7778 to 0.9254
		r (Pearson coefficient; "precision")	0.9226	0.8877	0.8826	0.8657	0.8587	0.9545		r (Pearson coefficient; "precision")	0.7994	0.65	0.653	0.6351	0.6487	0.9357
		Bias correction factor Cb ("accuracy")	0.9254	0.8134	0.9772	0.9748	0.981	0.9533		Bias correction factor Cb ("accuracy")	0.5255	0.3979	0.694	0.6859	0.8702	0.9297
		CA Tonometry: Carotid-Aortic GTF								CA Tonometry: Carotid-Aortic GTF
			aoSBP (SCOR_CT_GTF_sd)	aoSBP (SCOR_CT_GTF_033)	aoSBP (SCOR_CT_GTF_033HR)	aoSBP (SCOR_CT_GTF_0412)	aoSBP (SCOR_CT_GTF_osc)	aoSBP (SCOR_CT_GTF_inv)			aoPP (SCOR_CT_GTF_sd)	aoPP (SCOR_CT_GTF_033)	aoPP (SCOR_CT_GTF_033HR)	aoPP (SCOR_CT_GTF_0412)	aoPP (SCOR_CT_GTF_osc)	aoPP (SCOR_CT_GTF_inv)
		CCC	0.9022	0.7649	0.8868	0.8713	0.868	0.9428		CCC	0.6087	0.3361	0.5581	0.562	0.6969	0.9172
		CCC, 95% CI	0.8155 to 0.9493	0.6139 to 0.8619	0.7891 to 0.9407	0.7592 to 0.9333	0.7521 to 0.9319	0.8950 to 0.9692		CCC, 95% CI	0.4191 to 0.7474	0.1895 to 0.4680	0.3656 to 0.7047	0.3665 to 0.7100	0.5043 to 0.8234	0.8519 to 0.9544
		r (Pearson coefficient; "precision")	0.9096	0.8783	0.8951	0.8774	0.8794	0.9732		r (Pearson coefficient; "precision")	0.7871	0.7802	0.7773	0.7747	0.7869	0.9645
		Bias correction factor Cb ("accuracy")	0.9918	0.8709	0.9907	0.9931	0.9871	0.9688		Bias correction factor Cb ("accuracy")	0.7733	0.4308	0.7179	0.7255	0.8856	0.951
		CA Tonometry: Carotid calibration								CA Tonometry: Carotid calibration
			aoSBP (SCOR_CT_NPROC_sd)	aoSBP (SCOR_CT_NPROC_033)	aoSBP (SCOR_CT_NPROC_033HR)	aoSBP (SCOR_CT_NPROC_0412)	aoSBP (SCOR_CT_NPROC_osc)	aoSBP (CT_NPROC_inv)			aoPP (SCOR_CT_NPROC_sd)	aoPP (SCOR_CT_NPROC_033)	aoPP (SCOR_CT_NPROC_033HR)	aoPP (SCOR_CT_NPROC_0412)	aoPP (SCOR_CT_NPROC_osc)	aoPP (CT_NPROC_inv)
		CCC	0.9022	0.7915	0.8719	0.8552	0.8234	0.9715		CCC	0.6087	0.3618	0.6009	0.5892	0.7042	0.9582
		CCC, 95% CI	0.8155 to 0.9493	0.6475 to 0.8809	0.7625 to 0.9328	0.7313 to 0.9244	0.6818 to 0.9056	0.9456 to 0.9852		CCC, 95% CI	0.4191 to 0.7474	0.1980 to 0.5059	0.3949 to 0.7494	0.3741 to 0.7442	0.4961 to 0.8358	0.9202 to 0.9783
		r (Pearson coefficient; "precision")	0.9096	0.8746	0.8823	0.862	0.8623	0.981		r (Pearson coefficient; "precision")	0.7871	0.7353	0.7458	0.7244	0.7394	0.9712
		Bias correction factor Cb ("accuracy")	0.9918	0.905	0.9881	0.992	0.9549	0.9903		Bias correction factor Cb ("accuracy")	0.7733	0.492	0.8057	0.8133	0.9525	0.9866
		BA Tonometry: Radial-Aortic GTF								BA Tonometry: Radial-Aortic GTF
			aoSBP (SCOR_BT_GTF_sd)	aoSBP (SCOR_BT_GTF_033)	aoSBP (SCOR_BT_GTF_033HR)	aoSBP (SCOR_BT_GTF_0412)	aoSBP (SCOR_BT_GTF_osc)	aoSBP (SCOR_BT_GTF_inv)			aoPP (SCOR_BT_GTF_sd)	aoPP (SCOR_BT_GTF_033)	aoPP (SCOR_BT_GTF_033HR)	aoPP (SCOR_BT_GTF_0412)	aoPP (SCOR_BT_GTF_osc)	aoPP (SCOR_BT_GTF_inv)
		CCC	0.8479	0.5873	0.7878	0.7782	0.8011	0.8028		CCC	0.4556	0.2095	0.3761	0.3752	0.4867	0.6908
		CCC, 95% CI	0.7221 to 0.9194	0.3917 to 0.7321	0.6283 to 0.8838	0.6136 to 0.8780	0.6379 to 0.8954	0.6356 to 0.8980		CCC, 95% CI	0.2843 to 0.5987	0.09263 to 0.3206	0.1960 to 0.5316	0.1899 to 0.5346	0.2649 to 0.6596	0.4860 to 0.8237
		r (Pearson coefficient; "precision")	0.8832	0.8113	0.8414	0.8327	0.8193	0.8318		r (Pearson coefficient; "precision")	0.8442	0.7047	0.7268	0.7068	0.6991	0.7963
		Bias correction factor Cb ("accuracy")	0.96	0.7239	0.9363	0.9345	0.9777	0.9651		Bias correction factor Cb ("accuracy")	0.5397	0.2973	0.5174	0.5308	0.6962	0.8675
		BA Tonometry: Brachial NPMA (fs/6.0)								BA Tonometry: Brachial NPMA (fs/6.0)
			aoSBP (SCOR_BT_NPMA_60_sd	aoSBP (SCOR_BT_NPMA_60_033)	aoSBP (SCOR_BT_NPMA_60_033HR)	aoSBP (SCOR_BT_NPMA_60_0412)	aoSBP (SCOR_BT_NPMA_60_osc)	aoSBP (SCOR_BT_NPMA_60_inv)			aoPP (SCOR_BT_NPMA_60_sd	aoPP (SCOR_BT_NPMA_60_033)	aoPP (SCOR_BT_NPMA_60_033HR)	aoPP (SCOR_BT_NPMA_60_0412)	aoPP (SCOR_BT_NPMA_60_osc)	aoPP (SCOR_BT_NPMA_60_inv)
		CCC	0.8725	0.6322	0.7989	0.7881	0.7733	0.8198		CCC	0.5759	0.2535	0.464	0.4612	0.5754	0.7768
		CCC, 95% CI	0.7637 to 0.9331	0.4337 to 0.7722	0.6384 to 0.8928	0.6204 to 0.8869	0.5913 to 0.8804	0.6572 to 0.9095		CCC, 95% CI	0.3902 to 0.7166	0.1099 to 0.3867	0.2454 to 0.6376	0.2405 to 0.6365	0.3245 to 0.7507	0.5890 to 0.8850
		r (Pearson coefficient; "precision")	0.8908	0.8021	0.8244	0.8141	0.8013	0.8224		r (Pearson coefficient; "precision")	0.8409	0.6697	0.6879	0.6805	0.6691	0.7934
		Bias correction factor Cb ("accuracy")	0.9795	0.7882	0.9691	0.9682	0.9651	0.9969		Bias correction factor Cb ("accuracy")	0.6849	0.3785	0.6745	0.6777	0.8601	0.9791
		CA Distension waveform re-calibration								CA Distension waveform re-calibration
			aoSBP (Echo_ExpAdj_sd)	aoSBP (Echo_ExpAdj_033)	aoSBP (Echo_ExpAdj_033HR)	aoSBP (Echo_ExpAdj_0412)	aoSBP (Echo_ExpAdj_osc)	aoSBP (Echo_ExpAdj_inv)			aoPP (Echo_ExpAdj_sd)	aoPP (Echo_ExpAdj_033)	aoPP (Echo_ExpAdj_033HR)	aoPP (Echo_ExpAdj_0412)	aoPP (Echo_ExpAdj_osc)	aoPP (Echo_ExpAdj_inv)
		CCC	0.8004	0.7291	0.826	0.8254	0.7893	0.9424		CCC	0.5469	0.2617	0.4631	0.4613	0.5574	0.7352
		CCC, 95% CI	0.6540 to 0.8891	0.5711 to 0.8350	0.6823 to 0.9082	0.6823 to 0.9075	0.6241 to 0.8869	0.8915 to 0.9698		CCC, 95% CI	0.3584 to 0.6926	0.1111 to 0.4006	0.2174 to 0.6536	0.2198 to 0.6495	0.2905 to 0.7438	0.5382 to 0.8561
		r (Pearson coefficient; "precision")	0.869	0.8651	0.8294	0.8306	0.8117	0.9491		r (Pearson coefficient; "precision")	0.766	0.6082	0.5802	0.5883	0.5888	0.7547
		Bias correction factor Cb ("accuracy")	0.9211	0.8428	0.9958	0.9937	0.9724	0.993		Bias correction factor Cb ("accuracy")	0.7141	0.4303	0.7981	0.7841	0.9467	0.9742
		CCC: Concordance correlation coefficient. 95% CI: 95% Confidence Interval. Association between aoSBP obtained invasively and non-invasively (using several techniques and calibration methods (see text).								CCC: Concordance correlation coefficient. 95% CI: 95% Confidence Interval. Association between aoPP obtained invasively and non-invasively (using several techniques and calibration methods (see text).

## Sheet: Table_S8_ByA_aoSBP
	Table S8. Comparison of invasive (reference) and non-invasive methods used to quantify aoSBP: Bland-Altman analysis
		Systematic differences (mmHg)				Limits of agreement (mmHg)						Regression equation							Absolute % error
	BA Oscillometry: Brachial-Aortic GTF	Mean error	95 % CI ME		SD	Lower limit	95% CI LL		Upper limit	95% CI UL		Intercept	95% CI Intercept		Slope	95% CI Slope		P	p50th	p 95th
	bSBP (MOG_Osc)	1.306	-1.7091	4.3211	8.6413	-15.6309	-20.8349	-10.4269	18.2429	13.038	23.4469	27.7539	13.54	41.9674	-0.2011	-0.3074	-0.09474	0.00053	0.05	0.1525
	aoSBP (MOG_Osc_GTF_sd)	-8.5355	-12.459	-4.6114	11.2467	-30.579	-37.3521	-23.806	13.508	6.735	20.281	25.7479	7.2145	44.2814	-0.2606	-0.3993	-0.122	0.000564	0.0847	0.177
	aoSBP (MOG_Osc_GTF_033)	-8.5311	-12.777	-4.2853	12.1687	-32.3817	-39.71	-25.0535	15.3195	7.9912	22.6477	32.0609	12.937	51.1847	-0.3086	-0.4516	-0.1655	0.000114	0.0724	0.2133
	aoSBP (MOG_Osc_GTF_osc)	7.923	3.3374	12.5086	13.1424	-17.8361	-25.7508	-9.9215	33.6822	25.767	41.5969	33.6632	9.2654	58.0609	-0.1957	-0.3782	-0.01318	0.0364	0.0852	0.2228
	RA Tonometry: Radial-Aortic GTF	Mean error	95 % CI ME		SD	Lower limit	95% CI LL		Upper limit	95% CI UL		Intercept	95% CI Intercept		Slope	95% CI Slope		P	p50th	p 95th
	aoSBP (SCOR_RT_GTF_sd)	-9.8235	-13.093	-6.5533	9.3725	-28.1936	-33.8379	-22.5493	8.5465	2.9022	14.1908	14.2187	-2.815	31.2526	-0.1791	-0.3041	-0.05414	0.0064	0.0756	0.1492
	aoSBP (SCOR_RT_GTF_033)	-13.6005	-17.68	-9.5208	11.6924	-36.5177	-43.5591	-29.4762	9.3167	2.2752	16.3582	31.8462	14.649	49.0429	-0.3386	-0.4648	-0.2124	5.12e-06	0.0989	0.2082
	aoSBP (SCOR_RT_GTF_033HR)	-3.2132	-7.1949	0.7684	11.4114	-25.5797	-32.4519	-18.7074	19.1532	12.281	26.0254	34.345	15.474	53.2158	-0.2798	-0.4183	-0.1414	0.000252	0.0598	0.1395
	aoSBP (SCOR_RT_GTF_0412)	-3.5588	-7.7628	0.6451	12.0485	-27.1739	-34.4298	-19.918	20.0563	12.8	27.3122	34.825	14.57	55.0793	-0.286	-0.4346	-0.1374	0.000439	0.0634	0.1569
	aoSBP (SCOR_RT_GTF_osc)	1.7941	-2.5345	6.1228	12.406	-22.5217	-29.9929	-15.0505	26.1099	18.638	33.5811	34.0436	11.577	56.5098	-0.2403	-0.4051	-0.07543	0.0056	0.0736	0.1595
	aoSBP (SCOR_RT_GTF_inv)	-7.7426	-10.414	-5.0712	7.6563	-22.7489	-27.3597	-18.1382	7.2636	2.6529	11.8744	17.7864	5.2142	30.3586	-0.1902	-0.2825	-0.09796	0.000199	0.0548	0.1383
	RA Tonometry: 2nd Radial Shoulder	Mean error	95 % CI ME		SD	Lower limit	95% CI LL		Upper limit	95% CI UL		Intercept	95% CI Intercept		Slope	95% CI Slope		P	p50th	p 95th
	aoSBP (SCOR_RT_P2_sd)	-8.6484	-12.647	-4.6496	11.0912	-30.3872	-37.2934	-23.481	13.0903	6.1841	19.9966	10.4266	-9.529	30.3827	-0.1455	-0.2991	0.008138	0.0626	0.0734	0.1939
	aoSBP (SCOR_RT_P2_033)	-13.2396	-17.828	-8.6504	12.7286	-38.1876	-46.1133	-30.2618	11.7084	3.7827	19.6342	23.3395	3.1833	43.4957	-0.2806	-0.4357	-0.1254	0.000883	0.096	0.2083
	aoSBP (SCOR_RT_P2_033HR)	-2.5833	-7.2224	2.0557	12.867	-27.8026	-35.8145	-19.7907	22.6359	14.624	30.6478	24.7227	2.466	46.9795	-0.2128	-0.3842	-0.04145	0.0166	0.084	0.1513
	aoSBP (SCOR_RT_P2_0412)	-2.8125	-7.77	2.145	13.7502	-29.7629	-38.3248	-21.201	24.1379	15.576	32.6998	25.1437	1.1488	49.1386	-0.2178	-0.4025	-0.03306	0.0224	0.0749	0.1736
	aoSBP (SCOR_RT_P2_osc)	2.6458	-2.6602	7.9518	14.7169	-26.1992	-35.363	-17.0354	31.4909	22.327	40.6547	23.4581	-3.442	50.3587	-0.1643	-0.3714	0.04278	0.1156	0.06	0.2353
	aoSBP (SCOR_RT_P2_inv)	-6.3854	-9.7839	-2.9869	9.4262	-24.8607	-30.7302	-18.9913	12.0899	6.2205	17.9593	11.5967	-5.097	28.2906	-0.138	-0.2665	0.009454	0.0362	0.0587	0.1684
	RA Tonometry: Radial NPMA (fs/4.0)	Mean error	95 % CI ME		SD	Lower limit	95% CI LL		Upper limit	95% CI UL		Intercept	95% CI Intercept		Slope	95% CI Slope		P	p50th	p 95th
	aoSBP (SCOR_RT_NPMA_40_sd)	-10.1259	-13.386	-6.8652	9.3451	-28.4423	-34.0701	-22.8144	8.1905	2.5627	13.8183	14.806	-1.992	31.6043	-0.1858	-0.309	-0.0625	0.0043	0.0747	0.1631
	aoSBP (SCOR_RT_NPMA_40_033)	-13.9377	-17.936	-9.9386	11.4616	-36.4024	-43.3049	-29.5	8.527	1.6246	15.4295	31.6654	15.189	48.1416	-0.3398	-0.4607	-0.2189	2.41e-06	0.0972	0.2067
	aoSBP (SCOR_RT_NPMA_40_033HR)	-3.5629	-7.4426	0.3168	11.1193	-25.3566	-32.0529	-18.6604	18.2308	11.534	24.9271	33.9442	15.803	52.0848	-0.2795	-0.4126	-0.1463	0.00016	0.0523	0.1378
	aoSBP (SCOR_RT_NPMA_40_0412)	-4.1219	-8.2587	0.01492	11.8561	-27.3599	-34.5	-20.2199	19.1162	11.976	26.2562	35.152	15.613	54.6907	-0.2926	-0.436	-0.1493	0.000225	0.0577	0.1436
	aoSBP (SCOR_RT_NPMA_40_osc)	1.3724	-2.8168	5.5616	12.0064	-22.1601	-29.3906	-14.9296	24.9049	17.674	32.1354	33.7281	12.21	55.2455	-0.2411	-0.399	-0.08319	0.0039	0.0738	0.159
	aoSBP (SCOR_RT_NPMA_40_inv)	-8.0744	-10.702	-5.4467	7.531	-22.8352	-27.3705	-18.2998	6.6865	2.1511	11.2218	17.9979	5.9	30.0957	-0.1943	-0.283	-0.1055	9.54e-05	0.0546	0.1333
	RA Tonometry: Radial NPMA (fs/4.4)	Mean error	95 % CI ME		SD	Lower limit	95% CI LL		Upper limit	95% CI UL		Intercept	95% CI Intercept		Slope	95% CI Slope		P	p50th	p 95th
	aoSBP (SCOR_RT_NPMA_44_sd)	-8.5639	-11.805	-5.3227	9.2893	-26.7709	-32.3651	-21.1767	9.6431	4.0489	15.2373	15.5154	-1.319	32.3505	-0.1794	-0.303	-0.05588	0.0058	0.0675	0.1522
	aoSBP (SCOR_RT_NPMA_44_033)	-12.4424	-16.476	-8.4083	11.5617	-35.1034	-42.0661	-28.1406	10.2186	3.2558	17.1813	32.9712	16.136	49.8061	-0.3384	-0.4619	-0.2148	3.68e-06	0.087	0.1987
	aoSBP (SCOR_RT_NPMA_44_033HR)	-1.6673	-5.6395	2.3049	11.3844	-23.9807	-30.8367	-17.1248	20.6461	13.79	27.5021	35.6467	16.779	54.5139	-0.278	-0.4165	-0.1396	0.000271	0.0653	0.1428
	aoSBP (SCOR_RT_NPMA_44_0412)	-2.2618	-6.4714	1.9479	12.065	-25.9092	-33.175	-18.6433	21.3856	14.119	28.6514	36.9312	16.843	57.0187	-0.292	-0.4394	-0.1446	0.000317	0.0635	0.1542
	aoSBP (SCOR_RT_NPMA_44_osc)	3.445	-0.8519	7.7419	12.3148	-20.6921	-28.1084	-13.2758	27.5821	20.165	34.9984	35.58	13.302	57.8574	-0.2394	-0.4029	-0.07596	0.0054	0.0739	0.1807
	aoSBP (SCOR_RT_NPMA_44_inv)	-5.9438	-8.5731	-3.3144	7.5358	-20.714	-25.2522	-16.1757	8.8264	4.2882	13.3646	18.5699	6.0321	31.1078	-0.1827	-0.2747	-0.09065	0.00031	0.0483	0.1171
	CA Tonometry: Carotid-Aortic GTF	Mean error	95 % CI ME		SD	Lower limit	95% CI LL		Upper limit	95% CI UL		Intercept	95% CI Intercept		Slope	95% CI Slope		P	p50th	p 95th
	aoSBP (SCOR_CT_GTF_sd)	1.6818	-2.0163	5.3799	10.4294	-18.7597	-25.1445	-12.3749	22.1234	15.738	28.5081	25.5136	7.2785	43.7488	-0.182	-0.3189	-0.04517	0.0108	0.0547	0.1745
	aoSBP (SCOR_CT_GTF_033)	-11.401	-15.682	-7.1191	12.0759	-35.0698	-42.4626	-27.677	12.2678	4.875	19.6605	24.8382	5.6257	44.0507	-0.2768	-0.421	-0.1326	0.000463	0.0901	0.2224
	aoSBP (SCOR_CT_GTF_033HR)	-0.9434	-4.9134	3.0265	11.196	-22.8876	-29.7417	-16.0335	21.0007	14.146	27.8548	27.1674	8.0795	46.2553	-0.2147	-0.358	-0.07145	0.0046	0.0641	0.144
	aoSBP (SCOR_CT_GTF_0412)	-1.5232	-5.8002	2.7537	12.0619	-25.1646	-32.5489	-17.7804	22.1182	14.733	29.5024	25.2691	4.042	46.4962	-0.2047	-0.364	-0.04532	0.0135	0.0629	0.1621
	aoSBP (SCOR_CT_GTF_osc)	3.8753	-0.4385	8.189	12.1655	-19.9692	-27.4168	-12.5215	27.7197	20.272	35.1673	22.988	0.4254	45.5506	-0.146	-0.3153	0.02336	0.0886	0.0729	0.2066
	aoSBP (SCOR_CT_GTF_inv)	-5.9359	-7.9975	-3.8743	5.8141	-17.3315	-20.8909	-13.7722	5.4598	1.9004	9.0191	4.7192	-5.868	15.3065	-0.08139	-0.1609	0.00192	0.045	0.0497	0.1256
	CA Tonometry: Carotid calibration	Mean error	95 % CI ME		SD	Lower limit	95% CI LL		Upper limit	95% CI UL		Intercept	95% CI Intercept		Slope	95% CI Slope		P	p50th	p 95th
	aoSBP (SCOR_CT_NPROC_sd)	1.6818	-2.0163	5.3799	10.4294	-18.7597	-25.1445	-12.3749	22.1234	15.738	28.5081	25.5136	7.2785	43.7488	-0.182	-0.3189	-0.04517	0.0108	0.0547	0.1745
	aoSBP (SCOR_CT_NPROC_033)	-9.1293	-13.476	-4.7817	12.2611	-33.1611	-40.6672	-25.6549	14.9025	7.3963	22.4086	28.5429	9.2699	47.816	-0.2878	-0.4324	-0.1431	0.000312	0.0795	0.2082
	aoSBP (SCOR_CT_NPROC_033HR)	1.9652	-2.2221	6.1524	11.8089	-21.1804	-28.4097	-13.951	25.1107	17.881	32.34	31.4262	11.254	51.5975	-0.225	-0.3764	-0.07363	0.0049	0.0612	0.1838
	aoSBP (SCOR_CT_NPROC_0412)	1.4712	-3.0483	5.9907	12.7459	-23.5108	-31.3138	-15.7078	26.4532	18.65	34.2562	31.2817	9.1224	53.441	-0.2277	-0.394	-0.06138	0.0089	0.0577	0.1855
	aoSBP (SCOR_CT_NPROC_osc)	7.3697	2.7811	11.9583	12.9407	-17.994	-25.9162	-10.0718	32.7334	24.811	40.6556	29.9546	6.2362	53.6731	-0.1725	-0.3505	0.005515	0.0571	0.0753	0.2359
	aoSBP (SCOR_CT_NPROC_inv)	-2.9616	-4.7306	-1.1926	4.989	-12.7401	-15.7943	-9.6858	6.8169	3.7626	9.8711	7.6315	-1.231	16.4948	-0.08092	-0.1474	-0.01439	0.0188	0.0249	0.0694
	BA Tonometry: Radial-Aortic GTF	Mean error	95 % CI ME		SD	Lower limit	95% CI LL		Upper limit	95% CI UL		Intercept	95% CI Intercept		Slope	95% CI Slope		P	p50th	p 95th
	aoSBP (SCOR_BT_GTF_sd)	-4.2806	-8.4257	-0.1354	11.1009	-26.0382	-33.2023	-18.8742	17.4771	10.313	24.6412	33.1903	12.944	53.4366	-0.2785	-0.4268	-0.1302	0.000634	0.0613	0.1557
	aoSBP (SCOR_BT_GTF_033)	-15.1667	-20.388	-9.945	13.9838	-42.575	-51.5996	-33.5504	12.2417	3.2171	21.2663	43.8298	22.445	65.2137	-0.4385	-0.5951	-0.2818	3.76e-06	0.0932	0.2434
	aoSBP (SCOR_BT_GTF_033HR)	-5.1861	-9.9586	-0.4136	12.7809	-30.2367	-38.4849	-21.9884	19.8645	11.616	28.1127	42.4143	20.483	64.3453	-0.3538	-0.5144	-0.1931	0.000106	0.0463	0.182
	aoSBP (SCOR_BT_GTF_0412)	-5.0944	-9.9815	-0.2074	13.0877	-30.7463	-39.1925	-22.3	20.5574	12.111	29.0036	44.3067	22.072	66.541	-0.3672	-0.53	-0.2043	7.89e-05	0.0432	0.2039
	aoSBP (SCOR_BT_GTF_osc)	0.075	-4.9436	5.0936	13.44	-26.2674	-34.9411	-17.5938	26.4174	17.743	35.0911	45.5347	21.048	70.0206	-0.3379	-0.5172	-0.1585	0.000614	0.0401	0.197
	aoSBP (SCOR_BT_GTF_inv)	-5.575	-10.485	-0.6647	13.15	-31.3489	-39.8354	-22.8625	20.1989	11.712	28.6854	26.7389	-0.057	53.5355	-0.2402	-0.4365	-0.04386	0.0183	0.068	0.2091
	BA Tonometry: Brachial NPMA (fs/6.0)	Mean error	95 % CI ME		SD	Lower limit	95% CI LL		Upper limit	95% CI UL		Intercept	95% CI Intercept		Slope	95% CI Slope		P	p50th	p 95th
	aoSBP (SCOR_BT_NPMA_60_sd)	-0.7678	-4.7958	3.2601	10.787	-21.9104	-28.8719	-14.9489	20.3747	13.413	27.3362	35.7373	16.09	55.3844	-0.2713	-0.4152	-0.1274	0.000609	0.0584	0.1327
	aoSBP (SCOR_BT_NPMA_60_033)	-12.3265	-17.628	-7.0247	14.1987	-40.1559	-49.3192	-30.9927	15.5029	6.3396	24.6661	46.6798	24.591	68.7676	-0.4385	-0.6004	-0.2767	6.15e-06	0.0773	0.2259
	aoSBP (SCOR_BT_NPMA_60_033HR)	-1.5722	-6.5369	3.3925	13.2957	-27.6318	-36.2123	-19.0512	24.4874	15.906	33.0679	45.706	22.17	69.2418	-0.3514	-0.5238	-0.179	0.000263	0.0543	0.1579
	aoSBP (SCOR_BT_NPMA_60_0412)	-1.6827	-6.7717	3.4062	13.6285	-28.3946	-37.1898	-19.5993	25.0291	16.233	33.8244	46.9016	22.814	70.9883	-0.3611	-0.5375	-0.1846	0.000251	0.048	0.1818
	aoSBP (SCOR_BT_NPMA_60_osc)	4.0573	-1.1842	9.2988	14.037	-23.4553	-32.5143	-14.3964	31.5699	22.511	40.6289	49.1503	22.918	75.3816	-0.3351	-0.5273	-0.143	0.0013	0.0581	0.2355
	aoSBP (SCOR_BT_NPMA_60_inv)	-1.3949	-6.5023	3.7126	13.6779	-28.2036	-37.0307	-19.3764	25.4138	16.586	34.241	27.7747	-0.858	56.4083	-0.2168	-0.4266	-0.007037	0.0433	0.0611	0.2055
	CA Distension waveform re-calibration	Mean error	95 % CI ME		SD	Lower limit	95% CI LL		Upper limit	95% CI UL		Intercept	95% CI Intercept		Slope	95% CI Slope		P	p50th	p 95th
	aoSBP (Echo_CCA_ExpAdj_033)	-12.3685	-16.898	-7.839	12.9817	-37.8127	-45.6306	-29.9948	13.0756	5.2577	20.8935	30.772	11.786	49.7578	-0.3256	-0.4665	-0.1848	4.59e-05	0.097	0.2111
	aoSBP (Echo_CCA_ExpAdj_033HR)	-0.2659	-5.2935	4.7618	14.4094	-28.5082	-37.1859	-19.8306	27.9764	19.298	36.6541	31.8847	7.1207	56.6488	-0.2427	-0.4263	-0.05903	0.0112	0.0855	0.2172
	aoSBP (Echo_CCA_ExpAdj_0412)	-0.6915	-5.6843	4.3013	14.3095	-28.738	-37.3555	-20.1205	27.3551	18.737	35.9726	33.0488	8.7837	57.3139	-0.2547	-0.4346	-0.07473	0.007	0.0897	0.2078
	aoSBP (Echo_CCA_ExpAdj_osc)	5.9462	0.5179	11.3744	15.5574	-24.5463	-33.9153	-15.1773	36.4387	27.069	45.8077	32.2648	4.2705	60.2591	-0.1987	-0.4063	0.008946	0.0601	0.091	0.2642
	aoSBP (Echo_CCA_ExpAdj_inv)	-1.7021	-4.8302	1.426	8.9652	-19.2738	-24.6728	-13.8748	15.8697	10.47	21.2687	-8.1379	-25.03	8.7612	0.04858	-0.0767	0.1739	0.4356	0.0433	0.1548
	"Mean error" (average error considering 10 methods)	Mean error	95 % CI ME		SD	Lower limit	95% CI LL		Upper limit	95% CI UL		Intercept	95% CI Intercept		Slope	95% CI Slope		P	Median	p 95th
	Average Calibration: sd	-5.26467	-8.96046	-1.56863	10.3435	-25.5379	-31.9202	-19.1556	15.0086	8.6261	21.3908	22.2966	3.90561	40.6878	-0.207133	-0.343811	-0.0704802	0.0113897	0.0672222	0.163644
	Average Calibration: 033	-12.2143	-16.6769	-7.75129	12.5114	-36.7367	-44.4433	-29.0302	12.3081	4.60152	20.0146	32.6546	13.5812	51.7277	-0.33732	-0.47901	-0.1956	0.000183902	0.08886	0.21462
	Average Calibration: 033HR	-1.89212	-6.26932	2.48504	12.2526	-25.9071	-33.4656	-18.3487	22.1229	14.564	29.6813	34.1397	13.2921	54.987	-0.270856	-0.425611	-0.116107	0.00426133	0.0636444	0.161811
	Average Calibration: 0412	-2.25284	-6.83877	2.33305	12.8393	-27.4178	-35.3367	-19.4989	22.9121	14.9928	30.831	34.7622	12.7788	56.7453	-0.2782	-0.4414	-0.114966	0.00590121	0.0623333	0.174378
	Average Calibration: osc	3.39787	-1.34786	8.14358	13.2872	-22.645	-30.8398	-14.4502	29.4408	21.2456	37.6356	34.078	9.83834	58.3174	-0.230589	-0.410556	-0.0506088	0.0375793	0.0687444	0.208189
	Average Calibration: inv	-5.07952	-8.22429	-1.93469	8.7495	-22.2285	-27.6596	-16.7974	12.0695	6.63819	17.5006	13.853	-2.33274	30.0399	-0.14177	-0.261644	-0.019347	0.0664227	0.0514889	0.146833
	SD: Standard deviation. ME: mean error. 95% CI: 95% Confidence Interval. P: p value. LL and UP: lower and upper limit, respectively. fs: sampling frequency. Prefix "c" and "ao" indicate central and aortic root, respectively. SBP: systolic blood pressure. MOG, SCOR and Echo: values obtained using signals recorded with Mobil-O-Graph (Oscillometry), SphygmoCor (Applanation Tonometry) or Echography (…

## Sheet: Table_S9_ByA_aoPP
	Table S9. Comparison of invasive (reference) and non-invasive methods used to quantify aoPP: Bland-Altman analysis
		Systematic differences (mmHg)				Limits of agreement (mmHg)						Regression equation							Absolute % error
	BA Oscillometry: Brachial-Aortic GTF	Mean error	95 % CI ME		SD	Lower limit	95% CI LL		Upper limit	95% CI UL		Intercept	95% CI Intercept		Slope	95% CI Slope		P	p 50th	p 95th
	bPP (MOG_Osc)	-11.6829	-15.784	-7.5812	11.7554	-34.7235	-41.802	-27.6441	11.3578	4.2784	18.4372	18.2488	9.4712	27.0264	-0.4688	-0.6002	-0.3373	2.98e-08	0.223	0.4048
	aoPP (MOG_Osc_GTF_sd)	-22.9822	-28.131	-17.8329	14.758	-51.9078	-60.795	-43.0202	5.9435	-2.9441	14.8311	14.1634	2.9386	25.3883	-0.5817	-0.7499	-0.4136	5.44e-08	0.3626	0.5495
	aoPP (MOG_Osc_GTF_033)	-23.1186	-28.226	-18.0111	14.6381	-51.8092	-60.624	-42.9938	5.572	-3.2433	14.3874	13.4925	2.2506	24.7344	-0.5734	-0.7418	-0.405	7.45e-08	0.3997	0.5465
	aoPP (MOG_Osc_GTF_osc)	-7.3534	-12.597	-2.1092	15.0301	-36.8124	-45.863	-27.761	22.1056	13.0541	31.157	19.5579	4.3629	34.7528	-0.4215	-0.6491	-0.1939	0.000662	0.2371	0.38
	RA Tonometry: Radial-Aortic GTF	Mean error	95 % CI ME		SD	Lower limit	95% CI LL		Upper limit	95% CI UL		Intercept	95% CI Intercept		Slope	95% CI Slope		P	p 50th	p 95th
	aoPP (SCOR_RT_GTF_sd)	-23.4877	-27.899	-19.0764	12.643	-48.2681	-55.882	-40.6542	1.2926	-6.3213	8.9065	7.7034	-2.408	17.8148	-0.4739	-0.6209	-0.3268	2.14e-07	0.3723	0.5399
	aoPP (SCOR_RT_GTF_033)	-27.1446	-32.603	-21.6854	15.6461	-57.8109	-67.233	-48.3885	3.5217	-5.9008	12.9441	14.415	3.3245	25.5055	-0.6314	-0.7927	-0.4701	4.2e-09	0.3875	0.6255
	aoPP (SCOR_RT_GTF_033HR)	-16.9142	-22.283	-11.5448	15.3888	-47.0762	-56.343	-37.8087	13.2477	3.9803	22.5152	19.7816	6.941	32.6222	-0.5575	-0.7442	-0.3708	8.57e-07	0.2155	0.5642
	aoPP (SCOR_RT_GTF_0412)	-17.2721	-22.747	-11.7971	15.6912	-48.0268	-57.476	-38.5772	13.4827	4.0331	22.9322	18.8839	5.2988	32.469	-0.5493	-0.7469	-0.3518	2.88e-06	0.2412	0.5642
	aoPP (SCOR_RT_GTF_osc)	-11.7917	-17.405	-6.1783	16.0881	-43.3244	-53.013	-33.6358	19.7411	10.0524	29.4297	20.6658	5.1931	36.1385	-0.4931	-0.7181	-0.2681	9.36e-05	0.1648	0.5308
	aoPP (SCOR_RT_GTF_inv)	-9.0907	-11.972	-6.2091	8.2586	-25.2775	-30.251	-20.304	7.0961	2.1226	12.0697	8.1364	0.3664	15.9065	-0.2617	-0.3747	-0.1487	4.5e-05	0.1576	0.2733
	RA Tonometry: 2nd Radial Shoulder	Mean error	95 % CI ME		SD	Lower limit	95% CI LL		Upper limit	95% CI UL		Intercept	95% CI Intercept		Slope	95% CI Slope		P	p 50th	p 95th
	aoPP (SCOR_RT_P2_sd)	-21.2031	-26.014	-16.392	13.3444	-47.3581	-55.667	-39.0489	4.9519	-3.3573	13.2611	6.6917	-4.9901	18.3735	-0.4256	-0.6033	-0.2479	3.17e-05	0.357	0.5255
	aoPP (SCOR_RT_P2_033)	-25.7943	-31.427	-20.1614	15.6236	-56.4165	-66.145	-46.6881	4.828	-4.9004	14.5564	11.1231	-0.8945	23.1406	-0.5654	-0.7482	-0.3826	5.78e-07	0.3923	0.5894
	aoPP (SCOR_RT_P2_033HR)	-15.138	-20.762	-9.5134	15.6006	-45.7151	-55.429	-36.0011	15.4391	5.725	25.1531	16.0357	2.1497	29.9217	-0.4836	-0.6949	-0.2724	5.8e-05	0.2329	0.554
	aoPP (SCOR_RT_P2_0412)	-15.3672	-21.154	-9.5803	16.0508	-46.8267	-56.821	-36.8323	16.0923	6.0979	26.0867	15.0728	0.2688	29.8768	-0.4717	-0.6969	-0.2465	0.000177	0.241	0.554
	aoPP (SCOR_RT_P2_osc)	-9.5964	-15.592	-3.6004	16.6305	-42.1921	-52.547	-31.8367	22.9994	12.644	33.3547	16.1983	-0.5486	32.9453	-0.4029	-0.6577	-0.1482	0.003	0.1845	0.5173
	aoPP (SCOR_RT_P2_inv)	-6.3906	-9.7979	-2.9833	9.4506	-24.9138	-30.798	-19.0292	12.1325	6.2479	18.0172	5.525	-4.5606	15.6106	-0.1843	-0.3377	-0.03088	0.0202	0.1384	0.2834
	RA Tonometry: Radial NPMA (fs/4.0)	Mean error	95 % CI ME		SD	Lower limit	95% CI LL		Upper limit	95% CI UL		Intercept	95% CI Intercept		Slope	95% CI Slope		P	p 50th	p 95th
	aoPP (SCOR_RT_NPMA_40_sd)	-22.7068	-27.015	-18.3985	12.3475	-46.9078	-54.343	-39.4719	1.4943	-5.9417	8.9302	7.734	-2.1503	17.6182	-0.4625	-0.6062	-0.3187	2.21e-07	0.3531	0.52
	aoPP (SCOR_RT_NPMA_40_033)	-26.5186	-31.843	-21.194	15.2603	-56.4288	-65.618	-47.2387	3.3916	-5.7985	12.5817	14.5785	4.0659	25.0911	-0.6244	-0.7772	-0.4715	1.67e-09	0.3629	0.6169
	aoPP (SCOR_RT_NPMA_40_033HR)	-16.1438	-21.376	-10.9115	14.9959	-45.5357	-54.566	-36.5049	13.2482	4.2173	22.2791	20.0912	7.7738	32.4087	-0.5505	-0.7296	-0.3714	5.12e-07	0.2065	0.5503
	aoPP (SCOR_RT_NPMA_40_0412)	-16.7028	-22.074	-11.331	15.3956	-46.8781	-56.149	-37.6066	13.4726	4.201	22.7442	19.7739	6.833	32.7148	-0.5542	-0.7424	-0.366	1.09e-06	0.249	0.5503
	aoPP (SCOR_RT_NPMA_40_osc)	-10.9144	-16.258	-5.5702	15.3166	-40.9348	-50.158	-31.7108	19.1061	9.8821	28.3301	20.9972	6.5747	35.4197	-0.4848	-0.6946	-0.2751	4.63e-05	0.1616	0.5048
	aoPP (SCOR_RT_NPMA_40_inv)	-8.0744	-10.702	-5.4467	7.531	-22.8352	-27.37	-18.2998	6.6865	2.1511	11.2218	8.281	1.4055	15.1566	-0.2485	-0.3485	-0.1485	1.66e-05	0.1186	0.2779
	RA Tonometry: Radial NPMA (fs/4.4)	Mean error	95 % CI ME		SD	Lower limit	95% CI LL		Upper limit	95% CI UL		Intercept	95% CI Intercept		Slope	95% CI Slope		P	p 50th	p 95th
	aoPP (SCOR_RT_NPMA_44_sd)	-21.1448	-25.463	-16.8259	12.3781	-45.4059	-52.86	-37.9515	3.1163	-4.3381	10.5706	8.8571	-1.2716	18.9857	-0.4558	-0.6031	-0.3085	4.52e-07	0.3389	0.5037
	aoPP (SCOR_RT_NPMA_44_033)	-25.0233	-30.405	-19.6416	15.424	-55.2544	-64.543	-45.9657	5.2078	-4.0809	14.4966	15.9789	5.0628	26.8949	-0.6229	-0.7817	-0.4642	4e-09	0.3539	0.603
	aoPP (SCOR_RT_NPMA_44_033HR)	-14.2482	-19.595	-8.9011	15.3249	-44.285	-53.514	-35.056	15.7887	6.5596	25.0177	21.9261	8.991	34.8612	-0.5496	-0.7377	-0.3615	1.25e-06	0.1677	0.5391
	aoPP (SCOR_RT_NPMA_44_0412)	-14.8426	-20.31	-9.3747	15.6712	-45.5583	-54.995	-36.1207	15.873	6.4354	25.3105	21.5883	8.1425	35.0342	-0.5535	-0.749	-0.358	2.14e-06	0.2139	0.5391
	aoPP (SCOR_RT_NPMA_44_osc)	-8.8418	-14.31	-3.3728	15.6743	-39.5633	-49.002	-30.1239	21.8798	12.4404	31.3192	22.903	7.8648	37.9412	-0.4823	-0.701	-0.2636	8.63e-05	0.1199	0.5144
	aoPP (SCOR_RT_NPMA_44_inv)	-5.9438	-8.5731	-3.3144	7.5358	-20.714	-25.252	-16.1757	8.8264	4.2882	13.3646	9.666	2.5418	16.7902	-0.2372	-0.3408	-0.1336	5.28e-05	0.094	0.2263
	CA Tonometry: Carotid-Aortic GTF	Mean error	95 % CI ME		SD	Lower limit	95% CI LL		Upper limit	95% CI UL		Intercept	95% CI Intercept		Slope	95% CI Slope		P	p 50th	p 95th
	aoPP (SCOR_CT_GTF_sd)	-10.546	-15.15	-5.9414	12.9858	-35.9982	-43.948	-28.0484	14.9063	6.9564	22.8561	19.9414	10.0375	29.8452	-0.4814	-0.6303	-0.3324	2.3e-07	0.207	0.4266
	aoPP (SCOR_CT_GTF_033)	-23.6288	-28.429	-18.8281	13.5389	-50.165	-58.453	-41.8766	2.9074	-5.381	11.1959	11.0622	2.228	19.8965	-0.5477	-0.6805	-0.4149	1.69e-09	0.4	0.5421
	aoPP (SCOR_CT_GTF_033HR)	-13.1712	-17.832	-8.5102	13.1451	-38.9356	-46.982	-30.8883	12.5932	4.5458	20.6405	17.0576	6.7511	27.3641	-0.4773	-0.6322	-0.3223	5.52e-07	0.243	0.4647
	aoPP (SCOR_CT_GTF_0412)	-13.751	-18.393	-9.1085	13.0929	-39.4131	-47.428	-31.3977	11.9111	3.8957	19.9264	14.5345	3.5284	25.5406	-0.4466	-0.6121	-0.2811	5.06e-06	0.2641	0.4662
	aoPP (SCOR_CT_GTF_osc)	-8.3525	-12.863	-3.8412	12.7229	-33.2893	-41.078	-25.5005	16.5843	8.7954	24.3731	14.9087	2.8212	26.9962	-0.3673	-0.549	-0.1855	0.00026	0.1915	0.4166
	aoPP (SCOR_CT_GTF_inv)	-6.0874	-8.0378	-4.137	5.5005	-16.8683	-20.235	-13.5009	4.6935	1.3262	8.0609	0.7003	-5.2541	o 6.6548	-0.1072	-0.1967	-0.01764	0.0205	0.087	0.2743
	CA Tonometry: Carotid calibration	Mean error	95 % CI ME		SD	Lower limit	95% CI LL		Upper limit	95% CI UL		Intercept	95% CI Intercept		Slope	95% CI Slope		P	p 50th	p 95th
	aoPP (SCOR_CT_NPROC_sd)	-10.546	-15.15	-5.9414	12.9858	-35.9982	-43.948	-28.0484	14.9063	6.9564	22.8561	19.9414	10.0375	29.8452	-0.4814	-0.6303	-0.3324	2.3e-07	0.207	0.4266
	aoPP (SCOR_CT_NPROC_033)	-21.3571	-26.394	-16.3199	14.2059	-49.2007	-57.897	-40.5039	6.4865	-2.2102	15.1833	13.5757	3.5054	23.646	-0.5515	-0.703	-0.4001	2.28e-08	0.3641	0.5587
	aoPP (SCOR_CT_NPROC_033HR)	-10.2626	-15.139	-5.3863	13.7523	-37.2172	-45.636	-28.7981	16.692	8.2729	25.111	19.6545	8.1733	31.1357	-0.4723	-0.645	-0.2997	4.06e-06	0.214	0.4854
	aoPP (SCOR_CT_NPROC_0412)	-10.7566	-15.797	-5.7153	14.2173	-38.6225	-47.326	-29.9188	17.1094	8.4056	25.8131	18.2107	5.6304	30.7911	-0.4574	-0.6465	-0.2682	2.61e-05	0.2339	0.4854
	aoPP (SCOR_CT_NPROC_osc)	-4.8581	-9.8308	0.1146	14.0241	-32.3452	-40.93	-23.7598	22.6291	14.0436	31.2145	19.2481	5.5072	32.989	-0.3806	-0.5872	-0.174	0.000714	0.1373	0.6074
	aoPP (SCOR_CT_NPROC_inv)	-2.9414	-4.7034	-1.1794	4.9693	-12.6812	-15.723	-9.6391	6.7984	3.7562	9.8406	2.9131	-2.5119	o 8.3381	-0.09243	-0.174	-0.01087	0.0276	0.0437	0.1879
	BA Tonometry: Radial-Aortic GTF	Mean error	95 % CI ME		SD	Lower limit	95% CI LL		Upper limit	95% CI UL		Intercept	95% CI Intercept		Slope	95% CI Slope		P	p 50th	p 95th
	aoPP (SCOR_BT_GTF_sd)	-19.45	-23.673	-15.2263	11.3112	-41.6199	-48.919	-34.3201	2.7199	-4.5799	10.0197	10.5278	1.1223	19.9333	-0.4494	-0.5848	-0.3141	2.17e-07	0.315	0.4389
	aoPP (SCOR_BT_GTF_033)	-29.9444	-35.344	-24.5441	14.4625	-58.2909	-67.624	-48.9574	-1.598	-10.931	7.7355	11.298	0.9584	21.6377	-0.6183	-0.7671	-0.4696	2.96e-09	0.4666	0.6389
	aoPP (SCOR_BT_GTF_033HR)	-20.425	-25.55	-15.2995	13.7264	-47.3287	-56.187	-38.4703	6.4787	-2.3797	15.3372	14.6968	2.6595	26.7342	-0.5266	-0.6998	-0.3534	9.94e-07	0.3301	0.5056
	aoPP (SCOR_BT_GTF_0412)	-20.2472	-25.502	-14.9922	14.0733	-47.8308	-56.913	-38.7485	7.3364	-1.7459	16.4187	14.8837	2.1369	27.6305	-0.5267	-0.7101	-0.3433	2.51e-06	0.32	0.55
	aoPP (SCOR_BT_GTF_osc)	-15.2333	-20.557	-9.9089	14.2592	-43.1814	-52.383	-33.9791	12.7147	3.5124	21.917	15.9356	1.2767	30.5945	-0.4673	-0.6782	-0.2564	9.79e-05	0.2505	0.5056
	aoPP (SCOR_BT_GTF_inv)	-9.7111	-14.228	-5.1939	12.0972	-33.4217	-41.228	-25.6146	13.9994	6.1924	21.8065	10.9397	-3.1687	25.048	-0.3096	-0.5126	-0.1066	0.0041	0.1534	0.4804
	BA Tonometry: Brachial NPMA (fs/6.0)	Mean error	95 % CI ME		SD	Lower limit	95% CI LL		Upper limit	95% CI UL		Intercept	95% CI Intercept		Slope	95% CI Slope		P	p 50th	p 95th
	aoPP (SCOR_BT_NPMA_60_sd)	-14.1901	-18.372	-10.008	11.1997	-36.1415	-43.369	-28.9136	7.7614	0.5335	14.9892	14.2056	4.2614	24.1498	-0.4257	-0.5688	-0.2826	1.42e-06	0.2542	0.3568
	aoPP (SCOR_BT_NPMA_60_033)	-25.7488	-31.295	-20.2019	14.8548	-54.8641	-64.45	-45.2774	3.3666	-6.2201	12.9532	14.9375	3.3005	26.5744	-0.61	-0.7774	-0.4426	3.97e-08	0.4029	0.5449
	aoPP (SCOR_BT_NPMA_60_033HR)	-15.1111	-20.497	-9.7248	14.4246	-43.3832	-52.692	-34.0742	13.1611	3.8521	22.4701	19.0901	5.2577	32.9224	-0.5128	-0.7118	-0.3137	1.3e-05	0.2554	0.4243
	aoPP (SCOR_BT_NPMA_60_0412)	-15.2216	-20.665	-9.7781	14.5779	-43.7942	-53.202	-34.3863	13.351	3.943	22.7589	18.77	4.5639	32.9761	-0.5096	-0.714	-0.3052	2.07e-05	0.2679	0.4327
	aoPP (SCOR_BT_NPMA_60_osc)	-9.3649	-14.98	-3.7489	15.0399	-38.8431	-48.549	-29.137	20.1133	10.4072	29.8194	21.0337	4.7685	37.2989	-0.4558	-0.6898	-0.2217	0.000433	0.1951	0.4635
	aoPP (SCOR_BT_NPMA_60_inv)	-3.4476	-8.0485	1.1532	12.3213	-27.5974	-35.549	-19.6458	20.7022	12.7505	28.6539	14.9805	0.04012	29.9209	-0.2763	-0.4913	-0.06132	0.0136	0.1069	0.3639
	CA Distension waveform re-calibration	Mean error	95 % CI ME		SD	Lower limit	95% CI LL		Upper limit	95% CI UL		Intercept	95% CI Intercept		Slope	95% CI Slope		P	p 50th	p 95th
	aoPP (Echo_CCA_ExpAdj_033)	-24.9979	-30.725	-19.2706	16.4148	-57.1709	-67.056	-47.2856	7.175	-2.7103	17.0604	15.005	2.9922	27.0179	-0.6214	-0.7993	-0.4435	4.51e-08	0.4387	0.6029
	aoPP (Echo_CCA_ExpAdj_033HR)	-12.895	-19.066	-6.7239	17.6864	-47.5603	-58.211	-36.9092	21.7703	11.1192	32.4214	20.0464	3.3808	36.712	-0.5117	-0.7585	-0.2649	0.000186	0.3059	0.6239
	aoPP (Echo_CCA_ExpAdj_0412)	-13.3206	-19.408	-7.2328	17.4478	-47.5182	-58.025	-37.0108	20.8771	10.3696	31.3845	19.639	3.3301	35.9479	-0.512	-0.7535	-0.2705	0.000142	0.322	0.5547
	aoPP (Echo_CCA_ExpAdj_osc)	-6.6826	-13.117	-0.2481	18.4416	-42.8282	-53.934	-31.7222	29.4629	18.3569	40.5689	21.084	2.1029	40.065	-0.4313	-0.7124	-0.1502	0.0038	0.2408	0.7501
	aoPP (Echo_CCA_ExpAdj_inv)	-3.583	-9.1855	2.0194	15.8	-34.5511	-44.223	-24.8784	27.385	17.7124	37.0577	3.7326	-14.9	22.3658	-0.1138	-0.3945	0.1669	0.4147	0.1225	0.4692
	"Mean error" (average error considering 10 methods)	Mean error	95 % CI ME		SD	Lower limit	95% CI LL		Upper limit	95% CI UL		Intercept	95% CI Intercept		Slope	95% CI Slope		P	p 50th	p 95th
	Average Calibration: sd	-18.473	-22.9852	-13.9603	12.6615	-43.2895	-51.0812	-35.4975	6.34361	-1.44846	14.1356	12.1962	1.95303	22.4393	-0.470822	-0.621956	-0.319667	3.85982e-06	0.307456	0.476389
	Average Calibration: 033	-25.3276	-30.6691	-19.9858	15.0069	-54.7411	-63.9643	-45.5176	4.08586	-5.13765	13.3094	13.5466	2.67938	24.4139	-0.59664	-0.75689	-0.43641	7.7462e-08	0.39686	0.58688
	Average Calibration: 033HR	-14.9232	-20.2333	-9.61283	14.8939	-44.1152	-53.2844	-34.9456	14.2688	5.09917	23.4384	18.7089	5.78643	31.6314	-0.515767	-0.705967	-0.325567	2.94694e-05	0.241222	0.5235
	Average Calibration: 0412	-15.2757	-20.6722	-9.87889	15.1353	-44.941	-54.2594	-35.6221	14.3895	5.0706	23.7084	17.9285	4.41476	31.4423	-0.509	-0.707933	-0.310067	4.21644e-05	0.261444	0.521844
	Average Calibration: osc	-9.51508	-14.9903	-4.03936	15.3552	-39.6113	-49.066	-30.1562	20.5812	11.126	30.0363	19.2194	3.95117	34.4876	-0.4406	-0.665333	-0.215867	0.0009479	0.182889	0.5345
	Average Calibration: inv	-6.14111	-9.47202	-2.81013	9.27381	-24.3178	-30.0699	-18.5653	12.0356	6.28306	17.7881	7.20829	-2.8935	20.1141	-0.203448	-0.352311	-0.0545789	0.055646	0.113567	0.315178
	SD: Standard deviation. ME: mean error. 95% CI: 95% Confidence Interval. LL and UP: lower and upper limit, respectively. P: p value. fs: sampling frequency. Prefix "c" and "ao" indicate central and aortic root, respectively. PP: pulse blood pressure. MOG, SCOR and Echo: values obtained using signals recorded with Mobil-O-Graph (Oscillometry), SphygmoCor (Applanation tonometry) or Echography (vasc…
